# Supplementary material for: Guest-dependent directional complexation based on triptycene derived oxacalixarene: formation of oriented rotaxanes
Source: Royal Society of Chemistry journal article supplement (doi:10.1039/c5sc03511b), 2015-10-08
Supplement: c5sc03511b1.pdf [file c5sc03511b1.pdf]

## Electronic Supplementary Information

### Guest-dependent directional complexation based on triptycene derived oxacalixarene: formation of oriented rotaxanes

Han-Xiao Wang,<sup>a,c</sup> Zheng Meng,<sup>a,c</sup> Jun-Feng Xiang,<sup>a</sup> Yu-Xiang Xia,<sup>a</sup> Yihua Sun,<sup>b</sup> Shu-Zhen Hu,<sup>a</sup> Hui Chen,<sup>\*b</sup> Jiannian Yao,<sup>b</sup> and Chuan-Feng Chen<sup>\*a</sup>

<sup>a</sup>Beijing National Laboratory for Molecular Sciences, CAS Key Laboratory of Molecular Recognition and Function, Institute of Chemistry, Chinese Academy of Sciences, Beijing 100190, China. <sup>b</sup>CAS Key Laboratory of Photochemistry, Institute of Chemistry, Chinese Academy of Sciences, Beijing 100190, China. <sup>c</sup>University of Chinese Academy of Sciences, Beijing 100049, China.

E-mail: cchen@iccas.ac.cn

### Contents

1. Synthesis and characterization data of new compounds
2. Copies of <sup>1</sup>H NMR and <sup>13</sup>C NMR spectra of new compounds
3. Copies of 2D NMR spectra of rotaxanes
4. Copies of partial <sup>1</sup>H NMR spectra showing the ratios of isomers of R1a-b and R2a-b synthesized under different temperatures
5. <sup>1</sup>H NMR spectra of complexation between host H and guests G1-G3
6. Determination of the stoichiometries and association constants
7. Variable-temperature <sup>1</sup>H NMR spectra of H@G3 and G3
8. Crystal data
9. Computational methods
10. Cartesian coordinates of computed structures
11. References

## 1. Synthesis and characterization data of new compounds

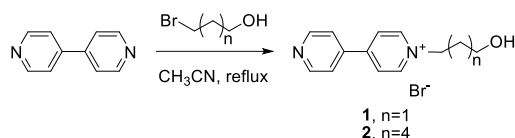

**General procedure for preparation of 1 and 2.** A mixture of 4,4'-bipyridine (156 mg, 1 mmol) and 3-bromopropanol (552 mg, or 6-bromohexanol, 720 mg, 4 mmol) was refluxed in acetonitrile (50 mL) for 24 h. After cooling to room temperature, the mixture was filtrated, and the residue was washed with ethyl acetate to afford the product (273 mg for **1**, 93% yield; and 306 mg for **2**, 91% yield) as white powder.

**1:** Mp: 172-174 °C. <sup>1</sup>H NMR (300 MHz, D<sub>2</sub>O): δ 9.05 (d, *J* = 6.1 Hz, 2H), 8.74 (d, *J* = 4.1 Hz, 2H), 8.43 (d, *J* = 6.1 Hz, 2H), 7.91 (d, *J* = 4.1 Hz, 2H), 4.85 (t, *J* = 7.4 Hz, 2H), 3.76-3.79 (m, 2H), 2.32-2.41 (m, 2H). <sup>13</sup>C NMR (75 MHz, D<sub>2</sub>O): δ 153.5, 150.0, 145.0, 142.3, 126.0, 122.5, 58.9, 57.9, 32.7. ESI-HRMS calcd for C<sub>13</sub>H<sub>15</sub>N<sub>2</sub>O [M-Br]<sup>+</sup> 215.1179; found 215.1178.

**2:** Mp: 162-163 °C. <sup>1</sup>H NMR (300 MHz, D<sub>2</sub>O): δ 9.00 (d, *J* = 6.7 Hz, 2H), 8.77 (d, *J* = 6.3 Hz, 2H), 8.42 (d, *J* = 6.7 Hz, 2H), 7.92 (d, *J* = 6.3 Hz, 2H), 4.70 (t, *J* = 7.3 Hz, 2H), 3.61 (t, *J* = 6.4 Hz, 2H), 2.08-2.13 (m, 2H), 1.55-1.60 (m, 2H), 1.41-1.46 (m, 4H). <sup>13</sup>C NMR (75 MHz, D<sub>2</sub>O): δ 153.7, 149.9, 144.7, 142.7, 126.0, 122.5, 61.6, 61.5, 31.0, 30.4, 25.0, 24.5. ESI-HRMS calcd for C<sub>16</sub>H<sub>21</sub>N<sub>2</sub>O [M-Br]<sup>+</sup> 257.1648; found 257.1646.

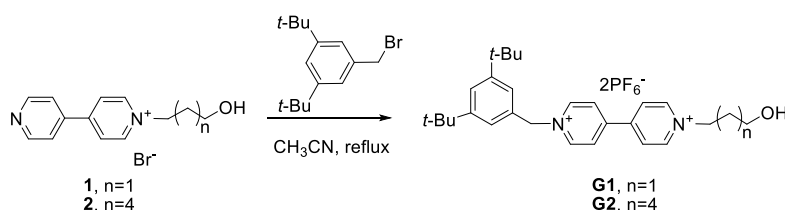

**General procedure for preparation of G1 and G2.** A mixture of **1** (147 mg, or **2**, 168 mg, 0.5mmol) and 1-(bromomethyl)-3,5-di-*tert*-butylbenzene<sup>[1]</sup> (212 mg, 0.75 mmol) was refluxed in acetonitrile (25 mL) for 72 h. After cooling to room temperature, the reaction mixture was filtrated, and the residue was washed with ethyl acetate. The crude product was dispersed in acetone, and then treated with excess saturated aqueous solution of NH<sub>4</sub>PF<sub>6</sub>. The solution was stirred at ambient temperature until clear. The acetone was removed under vacuum, and the residue was

then washed with water to afford **G1** (312 mg, 88% yield) and **G2** (323 mg, 86% yield) as white powder.

**G1**: Mp: 214-216 °C. <sup>1</sup>H NMR (300 MHz, CD<sub>3</sub>CN): δ 8.99 (d, *J* = 6.4 Hz, 2H, -C<sub>5</sub>H<sub>4</sub>N-), 8.93 (d, *J* = 6.4 Hz, 2H, -C<sub>5</sub>H<sub>4</sub>N-), 8.36-8.37 (m, 4H, -C<sub>5</sub>H<sub>4</sub>N-), 7.59 (s, 1H, ArH), 7.41 (s, 2H, ArH), 5.77 (s, 2H, -C<sub>5</sub>H<sub>4</sub>N-CH<sub>2</sub>-Ar), 4.75 (t, *J* = 6.9 Hz, 2H, -C<sub>5</sub>H<sub>4</sub>N-CH<sub>2</sub>-CH<sub>2</sub>), 3.57-3.62 (m, 2H, -OCH<sub>2</sub>), 2.90 (t, *J* = 4.9 Hz, 1H, -OH), 2.15-2.24 (m, 2H, -CH<sub>2</sub>CH<sub>2</sub>CH<sub>2</sub>-), 1.33 (s, 18H, Ar-*t*-Bu). <sup>13</sup>C NMR (75 MHz, CD<sub>3</sub>CN): δ 153.6, 151.2, 150.8, 146.9, 146.4, 132.9, 128.4, 128.0, 125.3, 124.8, 66.4, 60.8, 58.4, 35.7, 33.8, 31.5. ESI-HRMS calcd for C<sub>28</sub>H<sub>38</sub>F<sub>6</sub>N<sub>2</sub>OP [M-PF<sub>6</sub>]<sup>+</sup> 563.2626; found 563.2612.

**G2**: Mp: 192-193 °C. <sup>1</sup>H NMR (300 MHz, CD<sub>3</sub>CN): δ 9.00 (d, *J* = 6.4 Hz, 2H, -C<sub>5</sub>H<sub>4</sub>N-), 8.89 (d, *J* = 6.4 Hz, 2H, -C<sub>5</sub>H<sub>4</sub>N-), 8.37-8.39 (m, 4H, -C<sub>5</sub>H<sub>4</sub>N-), 7.59 (s, 1H, ArH), 7.42 (s, 2H, ArH), 5.77 (s, 2H, -C<sub>5</sub>H<sub>4</sub>N-CH<sub>2</sub>-Ar), 4.61 (t, *J* = 7.5 Hz, 2H, -C<sub>5</sub>H<sub>4</sub>N-CH<sub>2</sub>-CH<sub>2</sub>), 3.49 (t, *J* = 6.1 Hz, 2H, -OCH<sub>2</sub>-), 2.48 (brs, 1H, -OH), 2.00-2.09 (m, 2H, -CH<sub>2</sub>CH<sub>2</sub>CH<sub>2</sub>-), 1.45-1.54 (m, 2H, -CH<sub>2</sub>CH<sub>2</sub>CH<sub>2</sub>-), 1.38-1.42 (m, 4H, -CH<sub>2</sub>CH<sub>2</sub>CH<sub>2</sub>-), 1.33 (s, 18H, Ar-*t*-Bu). <sup>13</sup>C NMR (75 MHz, CD<sub>3</sub>CN): δ 153.6, 151.9, 151.3, 151.1, 150.9, 146.4, 132.9, 128.4, 128.2, 125.3, 124.9, 66.4, 63.1, 62.3, 35.8, 33.1, 31.9, 31.5, 26.4, 25.9. ESI-HRMS calcd for C<sub>31</sub>H<sub>44</sub>F<sub>6</sub>N<sub>2</sub>OP [M-PF<sub>6</sub>]<sup>+</sup> 605.3095; found 605.3075.

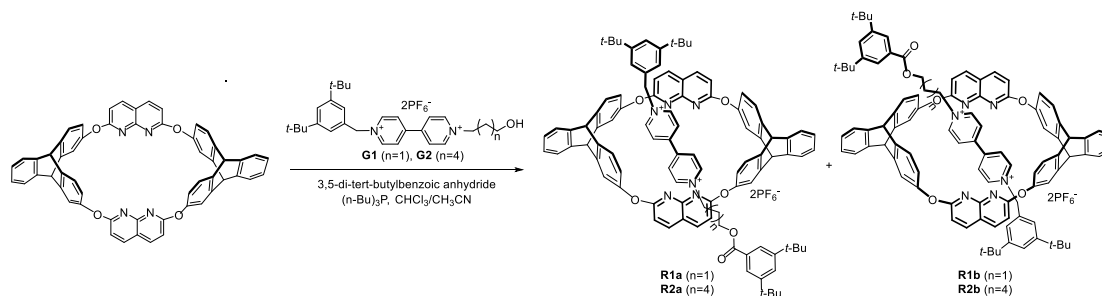

**Synthesis of R1a and R1b.** A mixture of **H** (62 mg, 0.075 mmol) and **G1** (53 mg, 0.075 mmol) in chloroform (10 mL) and acetonitrile (5 mL) was stirred at ambient temperature for 12h. To the mixture was then added 3,5-di-*tert*-butylbenzoic anhydride (135 mg, 0.3 mmol) and (*n*-Bu)<sub>3</sub>P (3 mg, 0.015 mmol). The reaction mixture was stirred under argon for 24 h at ambient temperature. The solvent was removed under vacuum, and the residue was purified by column chromatography (dichloromethane/acetone, 100:1 *v/v*) to give **R1a** and **R1b** as a mixture (73 mg) in total 56% yield. The macrocycle in unreacted pseudorotaxanes could be recycled nearly quantitatively. The

mixture was further separated carefully by preparative thin-layer chromatography to give pure **R1a** and **R1b** both as yellow powder for characterization.

**R1a**: Mp: 229-232 °C. <sup>1</sup>H NMR (300 MHz, CDCl<sub>3</sub>): δ 9.03 (d, *J* = 6.3 Hz, 2H, -C<sub>5</sub>H<sub>4</sub>N-), 8.45 (d, *J* = 6.4 Hz, 2H, -C<sub>5</sub>H<sub>4</sub>N-), 8.33 (d, *J* = 6.3 Hz, 2H, -C<sub>5</sub>H<sub>4</sub>N-), 8.00 (d, *J* = 8.6 Hz, 4H, naphthyridine ArH), 7.97 (s, 2H, stopper ArH), 7.71 (s, 1H, stopper ArH), 7.57 (s, 2H, stopper ArH), 7.51 (m, 3H, 2H for -C<sub>5</sub>H<sub>4</sub>N-, 1H for stopper ArH), 7.20 (d, *J* = 6.7 Hz, 2H, triptycene ArH), 7.13 (d, *J* = 6.7 Hz, 2H, triptycene ArH), 7.04-7.05 (m, 4H, triptycene ArH), 6.92 (d, *J* = 8.6 Hz, 4H, naphthyridine ArH), 6.72-6.83 (m, 8H, triptycene ArH), 6.40 (d, *J* = 7.9 Hz, 4H, triptycene ArH), 5.79 (s, 2H, -C<sub>5</sub>H<sub>5</sub>N-CH<sub>2</sub>-Ar), 5.24 (s, 4H, Ar<sub>3</sub>CH), 4.25 (t, *J* = 6.8 Hz, 2H, -C<sub>5</sub>H<sub>5</sub>N-CH<sub>2</sub>-CH<sub>2</sub>), 3.94 (t, *J* = 5.8 Hz, 2H, -OCH<sub>2</sub>), 1.93-2.02 (m, 2H, -CH<sub>2</sub>CH<sub>2</sub>CH<sub>2</sub>-), 1.36 (s, 18H, Ar-*t*-Bu), 1.29 (s, 18H, Ar-*t*-Bu). <sup>13</sup>C NMR (75 MHz, CDCl<sub>3</sub>): δ 166.8, 164.1, 153.6, 153.3, 151.3, 151.2, 150.7, 149.1, 147.8, 146.7, 145.3, 145.1, 144.8, 144.3, 141.4, 140.3, 131.2, 128.5, 127.9, 127.4, 126.1, 125.3, 124.9, 124.4, 124.2, 123.7, 123.5, 117.2, 116.4, 116.0, 112.6, 60.4, 58.0, 57.0, 53.2, 51.4, 35.1, 34.9, 31.7, 31.3, 29.7. ESI-HRMS calcd for C<sub>99</sub>H<sub>90</sub>N<sub>6</sub>O<sub>6</sub> [M-2PF<sub>6</sub>]<sup>2+</sup> 729.8472; found 729.8485.

**R1b**: Mp: 223-225 °C. <sup>1</sup>H NMR (300 MHz, CDCl<sub>3</sub>): δ 8.58 (d, *J* = 6.3 Hz, 2H, -C<sub>5</sub>H<sub>4</sub>N-), 8.20-8.22 (m, 6H, 4H for naphthyridine ArH and 2H for -C<sub>5</sub>H<sub>4</sub>N-), 8.06 (s, 2H, stopper ArH), 7.82 (d, *J* = 6.3 Hz, 2H, -C<sub>5</sub>H<sub>4</sub>N-), 7.76 (s, 1H, stopper ArH), 7.67 (d, *J* = 6.3 Hz, 2H, -C<sub>5</sub>H<sub>4</sub>N-), 7.55 (s, 1H, stopper ArH), 7.21-7.30 (m, 4H, triptycene ArH), 7.14-7.16 (m, 4H, triptycene ArH), 7.12 (s, 2H, stopper ArH), 7.02-7.05 (m, 8H, 4H for naphthyridine ArH and 4H for triptycene ArH), 6.88-6.91 (m, 4H, triptycene ArH), 6.67 (d, *J* = 7.9 Hz, 4H, triptycene ArH), 5.53 (s, 2H, -C<sub>5</sub>H<sub>5</sub>N-CH<sub>2</sub>-Ar), 5.37 (s, 2H, Ar<sub>3</sub>CH), 5.32 (s, 2H, Ar<sub>3</sub>CH), 4.28 (t, *J* = 6.2 Hz, 2H, -C<sub>5</sub>H<sub>5</sub>N-CH<sub>2</sub>-CH<sub>2</sub>), 4.03 (t, *J* = 6.3 Hz, 2H, -OCH<sub>2</sub>), 1.99-2.02 (m, 2H, -CH<sub>2</sub>CH<sub>2</sub>CH<sub>2</sub>-), 1.38 (s, 18H, Ar-*t*-Bu), 1.29 (s, 18H, Ar-*t*-Bu). <sup>13</sup>C NMR (125 MHz, CDCl<sub>3</sub>): δ 167.4, 164.0, 153.1, 151.7, 151.2, 148.7, 148.3, 147.2, 145.0, 144.8, 144.6, 144.3, 141.6, 141.2, 130.1, 129.7, 129.5, 129.0, 128.1, 125.4, 125.3, 125.0, 124.5, 124.1, 124.0, 123.7, 123.4, 117.8, 116.6, 115.9, 113.4, 60.6, 58.6, 54.8, 52.9, 52.2, 35.1, 35.0, 31.4, 31.3, 29.7. ESI-HRMS calcd for C<sub>99</sub>H<sub>90</sub>N<sub>6</sub>O<sub>6</sub> [M-2PF<sub>6</sub>]<sup>2+</sup> 729.8472; found 729.8454.

**Synthesis of R2a and R2b.** A mixture of **H** (62 mg, 0.075 mmol) and **G2** (56 mg, 0.075 mmol) in chloroform (10 mL) and acetonitrile (5 mL) was stirred at ambient temperature for 12h. To the mixture was then added 3,5-di-*tert*-butylbenzoic anhydride (135 mg, 0.3 mmol) and (*n*-Bu)<sub>3</sub>P (3 mg, 0.015 mmol). The reaction mixture was stirred under argon for 24 h at ambient temperature. The solvent was removed under vacuum, and the residue was purified by column chromatography (dichloromethane/acetone, 100:1 *v/v*) to give **R2a** and **R2b** as a mixture (71 mg) in total 53% yield. The macrocycle in unreacted pseudorotaxanes could be recycled nearly quantitatively. Then, the mixture was carefully separated by preparative thin-layer chromatography to give a fraction of pure **R2a** as yellow powder, but it turned out to be difficult to obtain pure **R2b** for further characterization.

**R2a:** Mp: 208-210 °C. <sup>1</sup>H NMR (600 MHz, CDCl<sub>3</sub>): δ 8.96 (brs, 2H, -C<sub>5</sub>H<sub>4</sub>N-), 8.39 (brs, 2H, -C<sub>5</sub>H<sub>4</sub>N-), 8.27 (brs, 2H, -C<sub>5</sub>H<sub>4</sub>N-), 8.00 (d, *J* = 7.8 Hz, 4H, naphthyridine ArH), 7.88 (s, 2H, stopper ArH), 7.63 (s, 1H, stopper ArH), 7.57-7.61 (m, 4H, 2H for stopper ArH and 2H for -C<sub>5</sub>H<sub>4</sub>N-), 7.52 (s, 1H, stopper ArH), 7.18 (d, *J* = 7.2 Hz, 2H, triptycene ArH), 7.09 (d, *J* = 7.2 Hz, 2H, triptycene ArH), 7.01 (brs, 4H, triptycene ArH), 6.90 (d, *J* = 7.8 Hz, 4H, naphthyridine ArH), 6.70-6.79 (m, 8H, triptycene ArH), 6.44 (d, *J* = 7.5 Hz, 4H, triptycene ArH), 5.77 (s, 2H, -C<sub>5</sub>H<sub>5</sub>N-CH<sub>2</sub>-Ar), 5.25 (s, 2H, Ar<sub>3</sub>CH), 5.22 (s, 2H, Ar<sub>3</sub>CH), 4.09 (t, *J* = 7.8 Hz, 2H, -C<sub>5</sub>H<sub>5</sub>N-CH<sub>2</sub>-CH<sub>2</sub>), 4.01 (brs, 2H, -OCH<sub>2</sub>), 1.48-1.50 (m, 2H, -CH<sub>2</sub>CH<sub>2</sub>CH<sub>2</sub>-), 1.35-1.38 (m, 2H, -CH<sub>2</sub>CH<sub>2</sub>CH<sub>2</sub>-), 1.31 (s, 18H, Ar-*t*-Bu), 1.27 (s, 18H, Ar-*t*-Bu), 1.07-1.10 (m, 2H, -CH<sub>2</sub>CH<sub>2</sub>CH<sub>2</sub>-), 0.84-0.87 (m, 2H, -CH<sub>2</sub>CH<sub>2</sub>CH<sub>2</sub>-). <sup>13</sup>C NMR (75 MHz, CDCl<sub>3</sub>): δ 167.3, 164.0, 153.5, 153.2, 151.2, 150.5, 148.9, 147.5, 146.7, 145.2, 145.0, 144.7, 144.4, 141.5, 140.4, 131.5, 129.6, 127.5, 127.2, 126.1, 125.3, 124.9, 124.8, 124.2, 123.7, 123.5(6), 123.5(2), 117.2, 116.4, 116.2, 112.5, 64.3, 60.8, 53.1, 51.5, 35.1, 34.9, 31.3(8), 31.3(5), 31.1, 29.7, 28.2, 25.2, 25.0. ESI-HRMS calcd for C<sub>102</sub>H<sub>96</sub>N<sub>6</sub>O<sub>6</sub> [M-2PF<sub>6</sub>]<sup>2+</sup> 750.8707; found 750.8716.

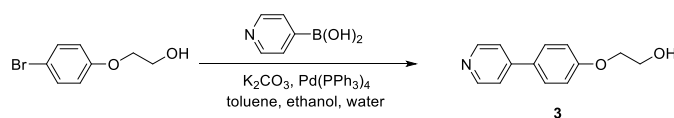

**Synthesis of 3.** To a mixture of 2-(4-bromophenoxy)ethanol<sup>[2]</sup> (1.08 g, 5 mmol), pyridine-4-boronic acid (676 mg, 5.5 mmol) and K<sub>2</sub>CO<sub>3</sub> (2.07g, 15 mmol) in toluene (20 mL), ethanol (20

mL), and degassed water (10 mL) was added Pd(PPh<sub>3</sub>)<sub>4</sub> (289 mg, 5.0 mol%). The mixture was then refluxed for 24 h. After the reaction mixture was cooled to room temperature, 50 mL dichloromethane and 50 mL water was added. The organic phase was separated, and the solvent was removed under vacuum. The residue was purified by column chromatography (petroleum/ethyl acetate, 2:1 v/v) to afford **3** (763 mg, 71% yield) as yellow powder. Mp: 181-182 °C. <sup>1</sup>H NMR (300 MHz, CDCl<sub>3</sub>): δ 8.62 (d, *J* = 6.0 Hz, 2H), 7.60 (d, *J* = 8.7 Hz, 2H), 7.47 (d, *J* = 6.0 Hz, 2H), 7.03 (d, *J* = 8.7 Hz, 2H), 4.14-4.17 (m, 2H), 3.99-4.02 (m, 2H), 2.23 (brs, 1H). <sup>13</sup>C NMR (75 MHz, CDCl<sub>3</sub>): δ 159.7, 150.1, 147.8, 130.7, 128.2, 121.1, 115.2, 69.4, 61.3. ESI-HRMS calcd for C<sub>13</sub>H<sub>14</sub>NO<sub>2</sub>[M+H]<sup>+</sup> 216.1024; found 216.1020.

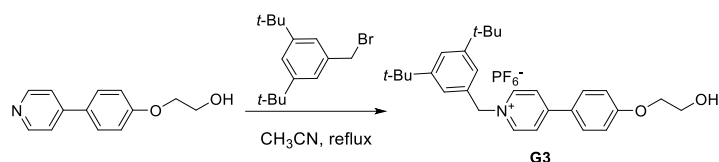

**Synthesis of G3.** A mixture of **3** (215 mg, 1 mmol) and 1-(bromomethyl)-3,5-di-*tert*-butylbenzene (423 mg, 1.5 mmol) was refluxed in acetonitrile (50 mL) for 24 h. After cooling to room temperature, the solvent was removed under vacuum, the residue was washed with ethyl acetate, dispersed in acetone, and then treated with excess saturated aqueous solution of NH<sub>4</sub>PF<sub>6</sub>. The solution was stirred at ambient temperature until clear. The acetone was removed under vacuum, and the reaction mixture was then filtrated. The residue was washed with water to afford **G3** (479 mg, 85% yield) as white powder. Mp: 231-233 °C. <sup>1</sup>H NMR (300 MHz, CD<sub>3</sub>CN): δ 8.65 (d, *J* = 7.0 Hz, 2H, -C<sub>5</sub>H<sub>4</sub>N-), 8.18 (d, *J* = 7.0 Hz, 2H, -C<sub>5</sub>H<sub>4</sub>N-), 7.92 (d, *J* = 9.0 Hz, 2H, ArH), 7.56 (s, 2H, ArH), 7.36 (s, 2H, ArH), 7.16 (d, *J* = 9.0 Hz, 2H, ArH), 5.58 (s, 2H, -C<sub>3</sub>H<sub>4</sub>N-CH<sub>2</sub>-Ar), 4.13-4.16 (m, 2H, -CH<sub>2</sub>CH<sub>2</sub>-), 3.82-3.87 (m, 2H, -CH<sub>2</sub>CH<sub>2</sub>-), 3.01 (brs, 1H, -OH), 1.32 (s, 18H, Ar-*t*-Bu). <sup>13</sup>C NMR (75 MHz, CD<sub>3</sub>CN): δ 164.0, 156.9, 153.4, 144.8, 133.7, 131.1, 126.6, 125.0, 124.9, 124.5, 116.8, 71.1, 65.0, 61.2, 35.7, 31.5. ESI-HRMS calcd for C<sub>28</sub>H<sub>36</sub>NO<sub>2</sub> [M-PF<sub>6</sub>]<sup>+</sup> 418.2741; found 418.2738.

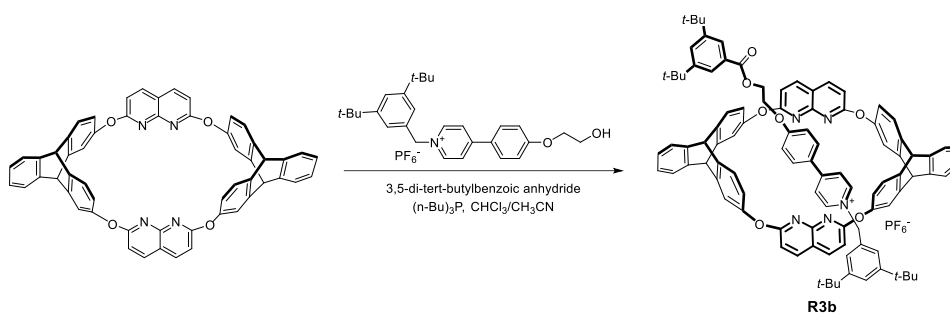

**Synthesis of R3b.** A mixture of **H** (62 mg, 0.075 mmol) and **G3** (43 mg, 0.075 mmol) in a solution of chloroform (10 mL) and acetonitrile (5 mL) was stirred at ambient temperature for 12h. Then, to the mixture was added 3,5-di-*tert*-butylbenzoic anhydride (135 mg, 0.3 mmol) and (*n*-Bu)<sub>3</sub>P (3 mg, 0.015 mmol). The reaction mixture was stirred under argon for 24 h at ambient temperature. The solvent was removed under vacuum. The residue was purified by column chromatography (dichloromethane/acetone, 100:1 v/v) to give **R3b** (63 mg, 52% yield) as white powder. The macrocycle in unreacted pseudorotaxanes could be recycled nearly quantitatively. Mp: 211-213 °C. <sup>1</sup>H NMR (400 MHz, CDCl<sub>3</sub>): δ 8.08 (d, *J* = 8.6 Hz, 4H, naphthyridine Ar*H*), 8.03 (d, *J* = 8.5 Hz, 2H, -Ar*H*-C<sub>5</sub>H<sub>4</sub>N-), 8.00 (s, 2H, stopper Ar*H*), 7.79 (d, *J* = 6.2 Hz, 2H, -C<sub>5</sub>H<sub>4</sub>N-), 7.66 (s, 1H, stopper Ar*H*), 7.53 (d, *J* = 6.2 Hz, 2H, -C<sub>5</sub>H<sub>4</sub>N-), 7.40 (d, *J* = 8.5 Hz, 2H, -Ar*H*-C<sub>5</sub>H<sub>4</sub>N-), 7.23 (s, 1H, stopper Ar*H*), 7.17-7.23 (m, 4H, triptycene Ar*H*), 7.02 (d, *J* = 8.6 Hz, 4H, naphthyridine Ar*H*), 6.98 (brs, 4H, triptycene Ar*H*), 6.87-6.89 (m, 4H, triptycene Ar*H*), 6.79-6.85 (m, 8H, triptycene Ar*H*), 6.55 (s, 2H, stopper Ar*H*), 5.15 (s, 2H, Ar<sub>3</sub>CH), 4.95 (s, 2H, Ar<sub>3</sub>CH), 4.86 (brs, 4H, 2H for -OCH<sub>2</sub>, 2H for C<sub>5</sub>H<sub>5</sub>N-CH<sub>2</sub>-Ar), 4.61 (t, *J* = 4.2 Hz, 2H, -OCH<sub>2</sub>), 1.35 (s, 18H, Ar-*t*-Bu), 1.08 (s, 18H, Ar-*t*-Bu). <sup>13</sup>C NMR (75 MHz, CDCl<sub>3</sub>): δ 167.3, 164.1, 162.1, 153.8, 153.0, 151.9, 151.2, 150.1, 146.2, 145.3, 144.6, 141.9, 141.0, 140.0, 130.5, 129.9, 129.3, 127.4, 126.9, 125.3, 125.0, 124.0, 123.7, 123.5(5), 123.5(0), 123.4, 117.1, 117.0, 115.7, 112.3, 66.6, 62.7, 53.5, 52.3, 35.0, 34.6, 31.4, 31.1, 29.3. ESI-HRMS calcd for C<sub>99</sub>H<sub>88</sub>N<sub>5</sub>O<sub>7</sub> [M-PF<sub>6</sub>]<sup>+</sup> 1458.6678; found 1458.6679.

## 2. Copies of $^1\text{H}$ NMR and $^{13}\text{C}$ NMR spectra of new compounds<sup>[3]</sup>

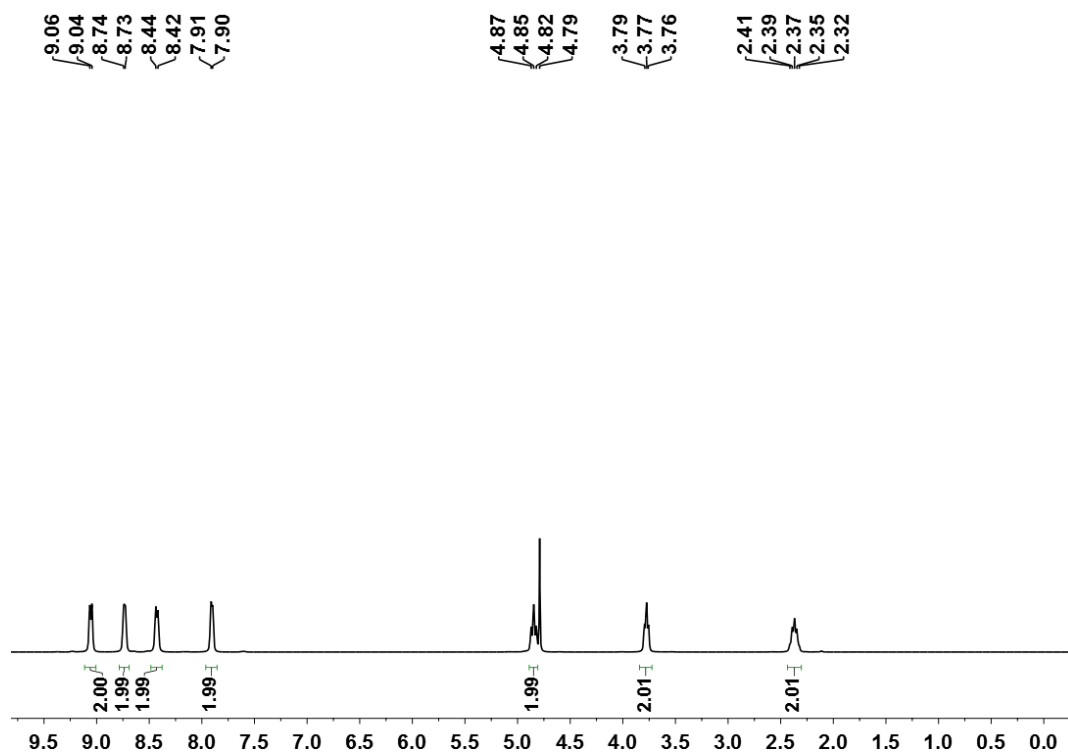

Fig. S1  $^1\text{H}$  NMR spectrum (300 MHz,  $\text{D}_2\text{O}$ ) of **1**.

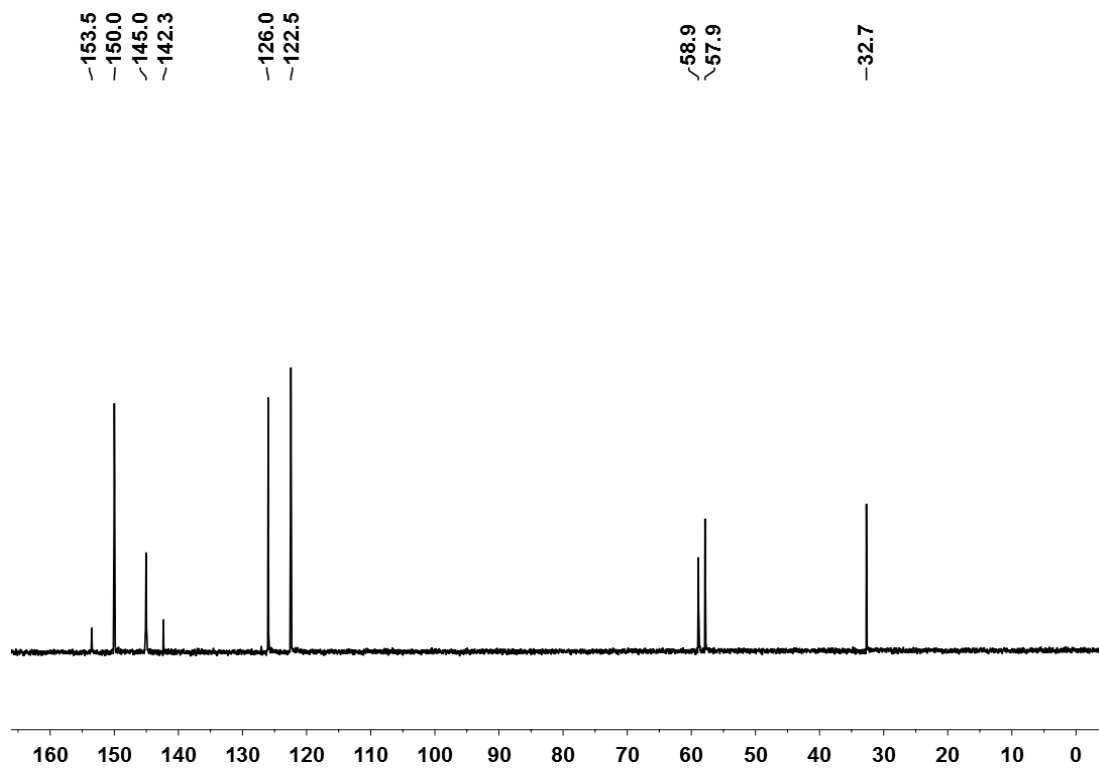

Fig. S2  $^{13}\text{C}$  NMR spectrum (75 MHz,  $\text{D}_2\text{O}$ ) of **1**.



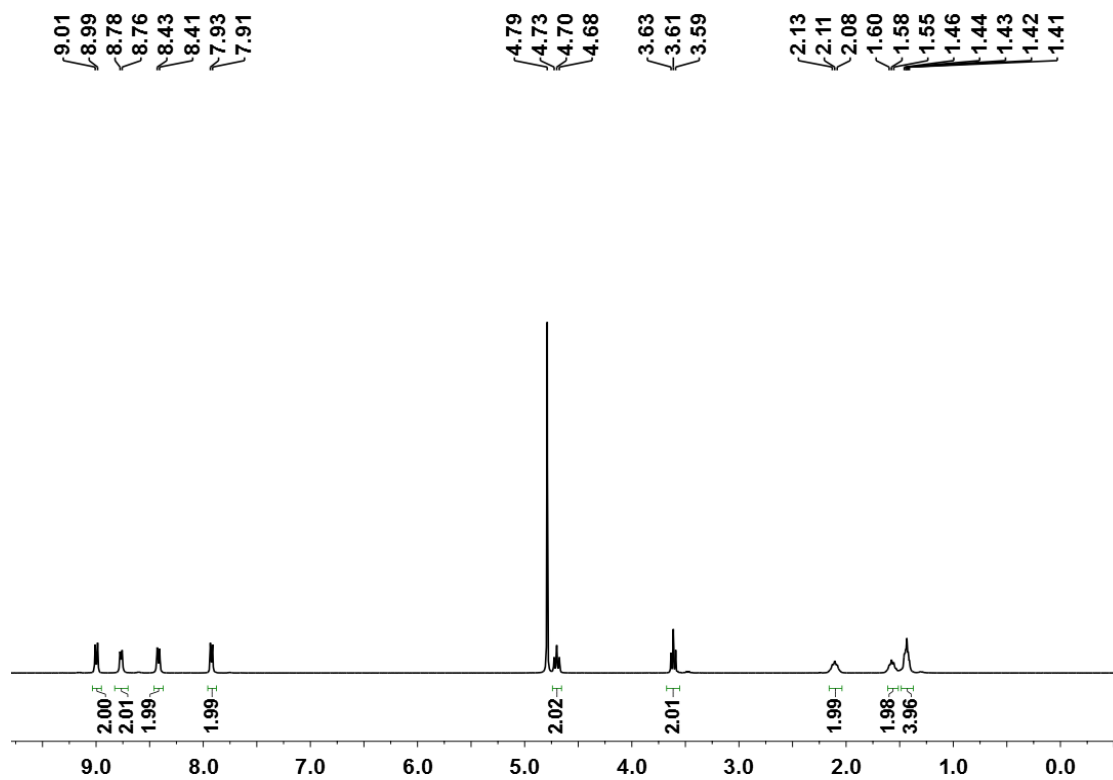

Fig. S3  $^1\text{H}$  NMR spectrum (300 MHz,  $\text{D}_2\text{O}$ ) of **2**.

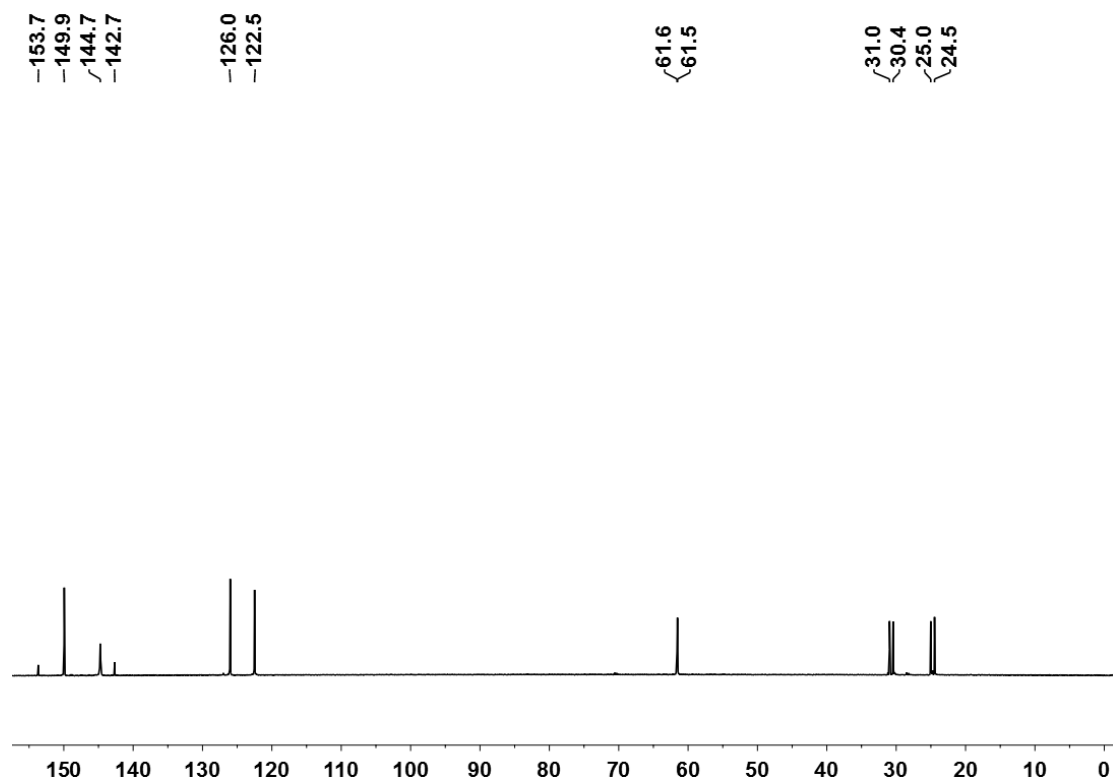

Fig. S4  $^{13}\text{C}$  NMR spectrum (75 MHz,  $\text{D}_2\text{O}$ ) of **2**.

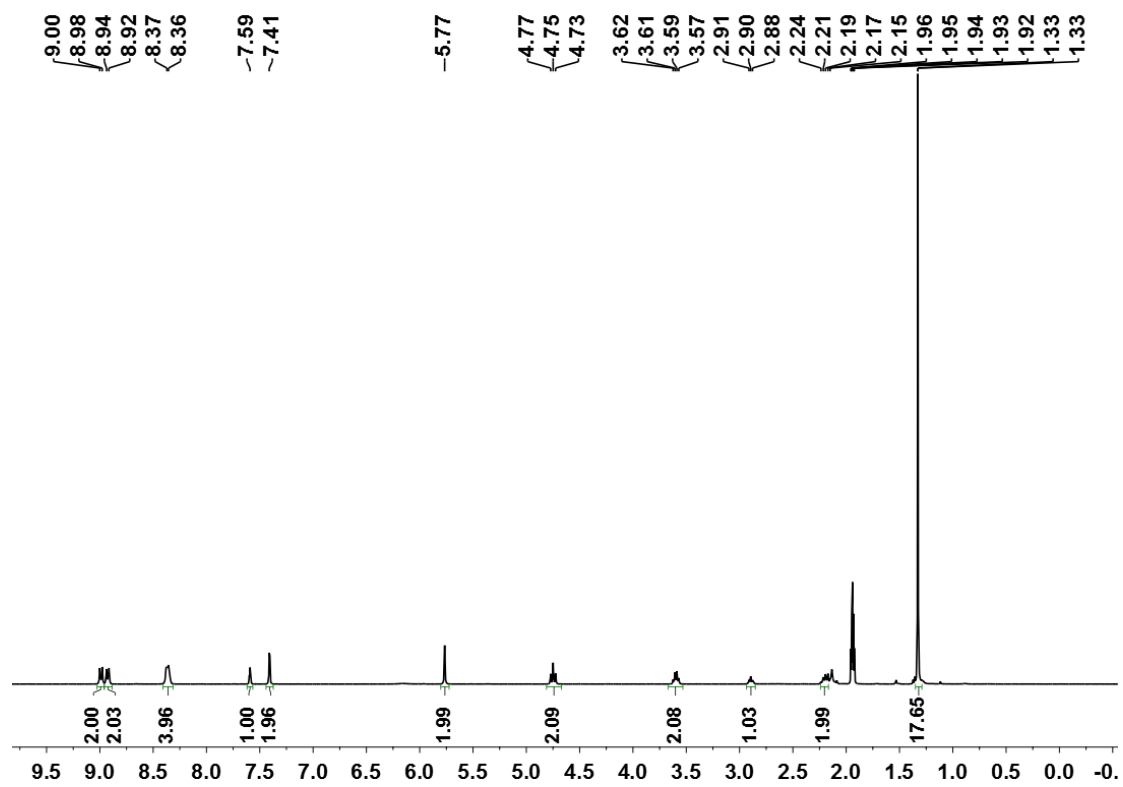

Fig. S5  $^1\text{H}$  NMR spectrum (300 MHz,  $\text{CD}_3\text{CN}$ ) of G1.

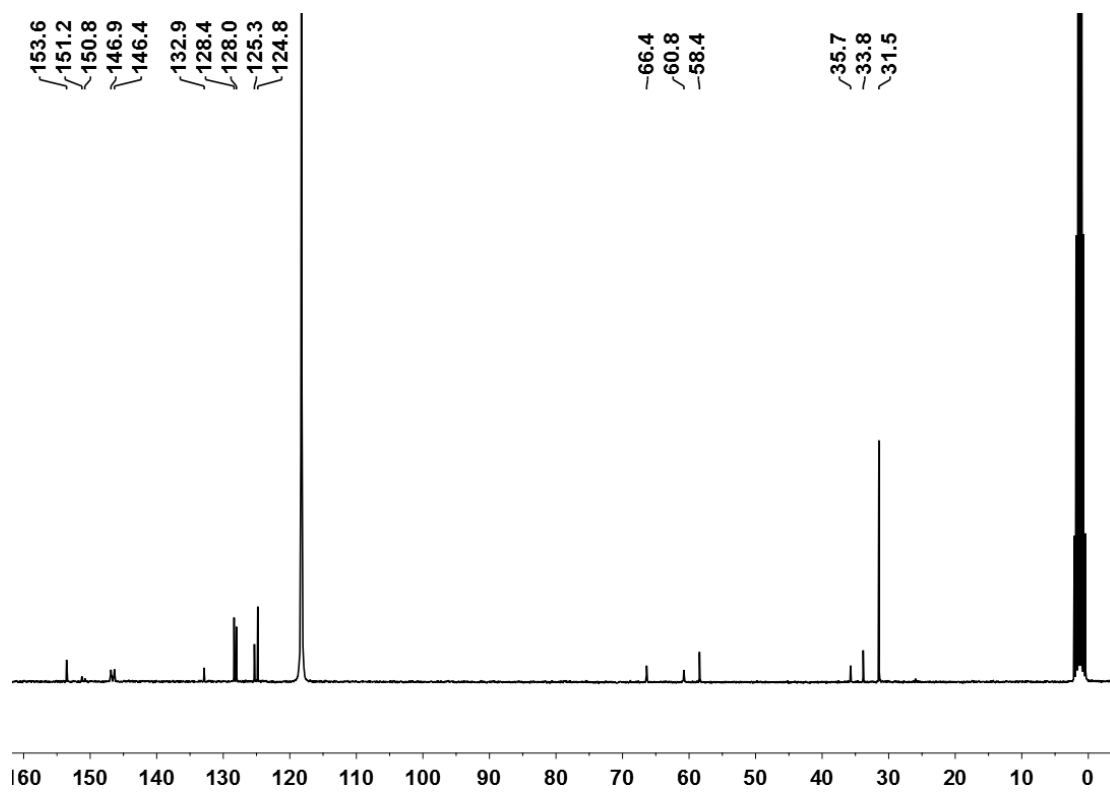

Fig. S6  $^{13}\text{C}$  NMR spectrum (75 MHz,  $\text{CD}_3\text{CN}$ ) of G1.

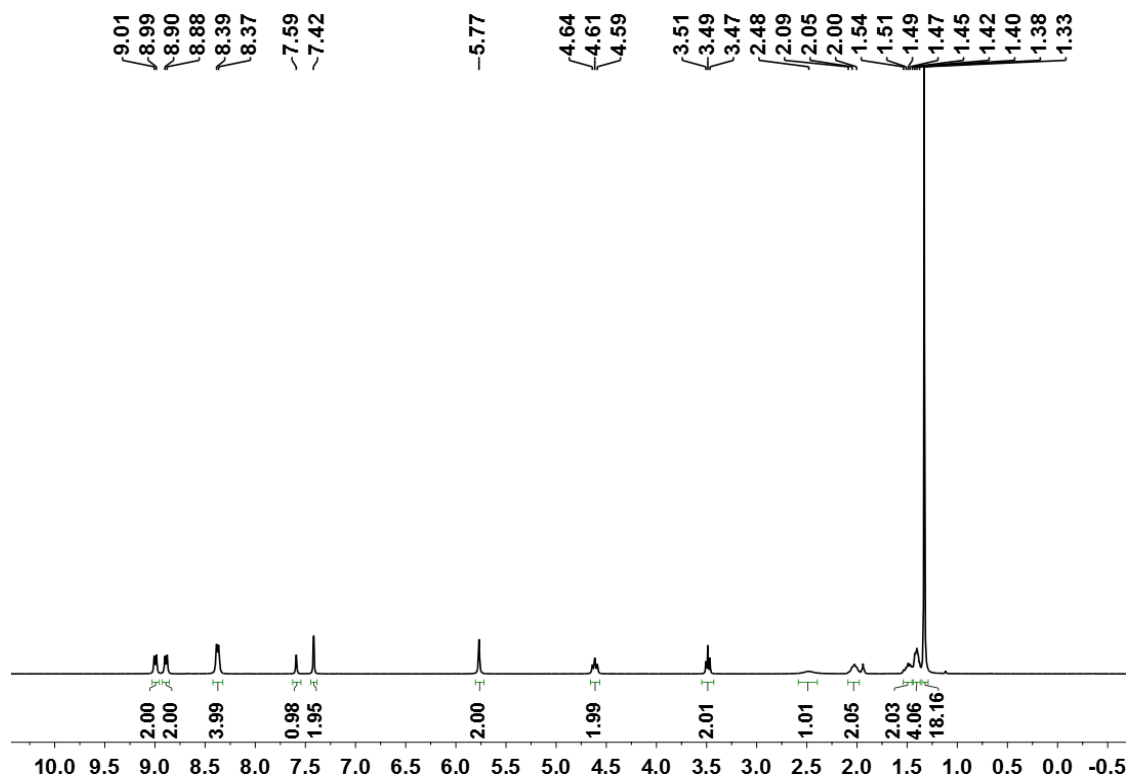

Fig. S7  $^1\text{H}$  NMR spectrum (300 MHz,  $\text{CD}_3\text{CN}$ ) of G2.

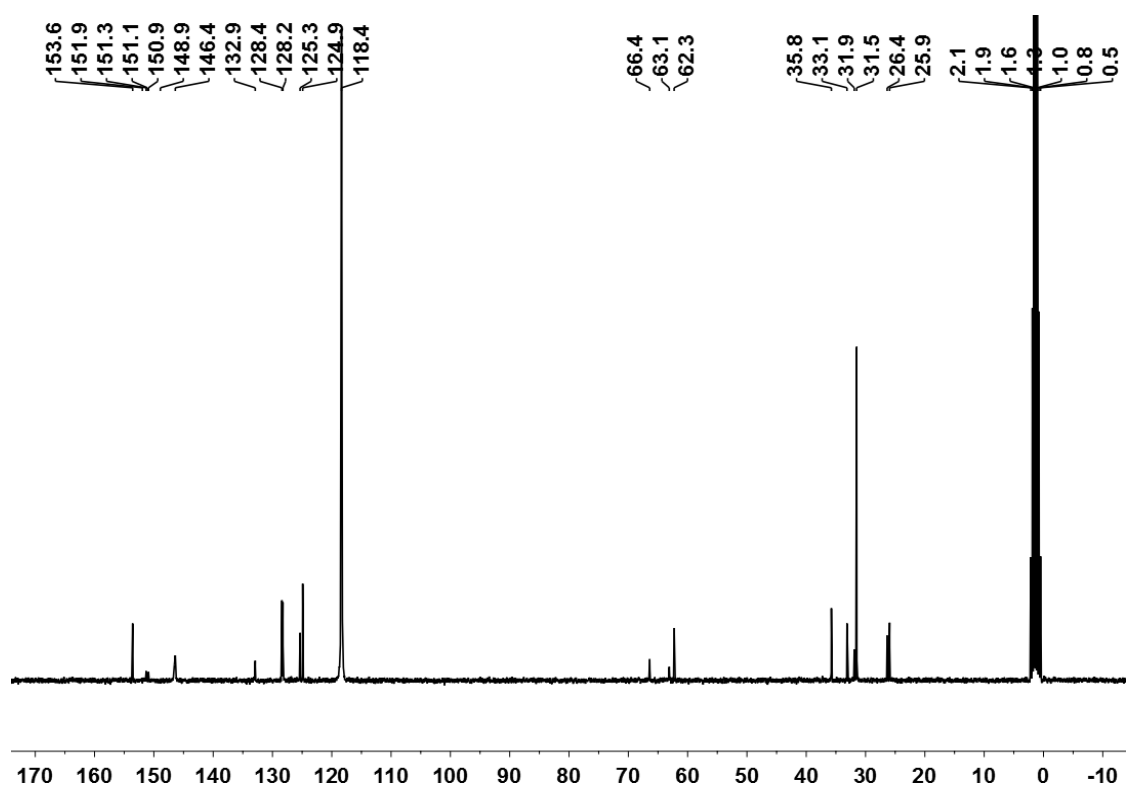

Fig. S8  $^{13}\text{C}$  NMR spectrum (75 MHz,  $\text{CD}_3\text{CN}$ ) of G2.

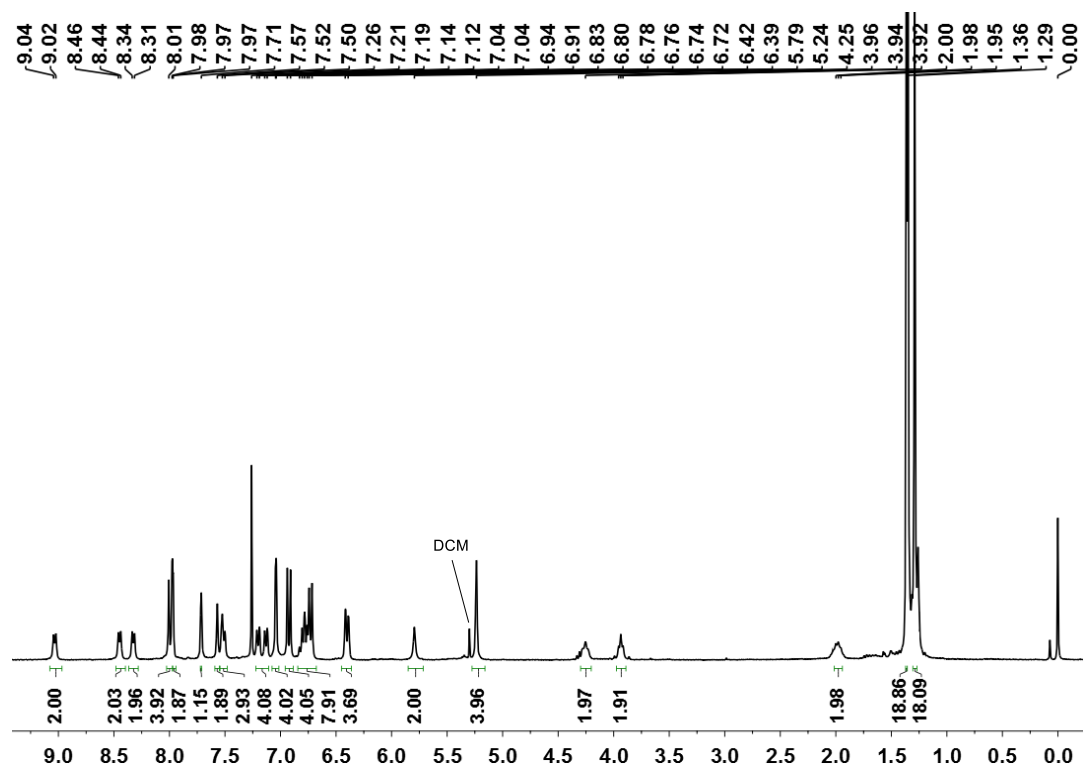

Fig. S9  $^1\text{H}$  NMR spectrum (300 MHz,  $\text{CDCl}_3$ ) of **R1a**.

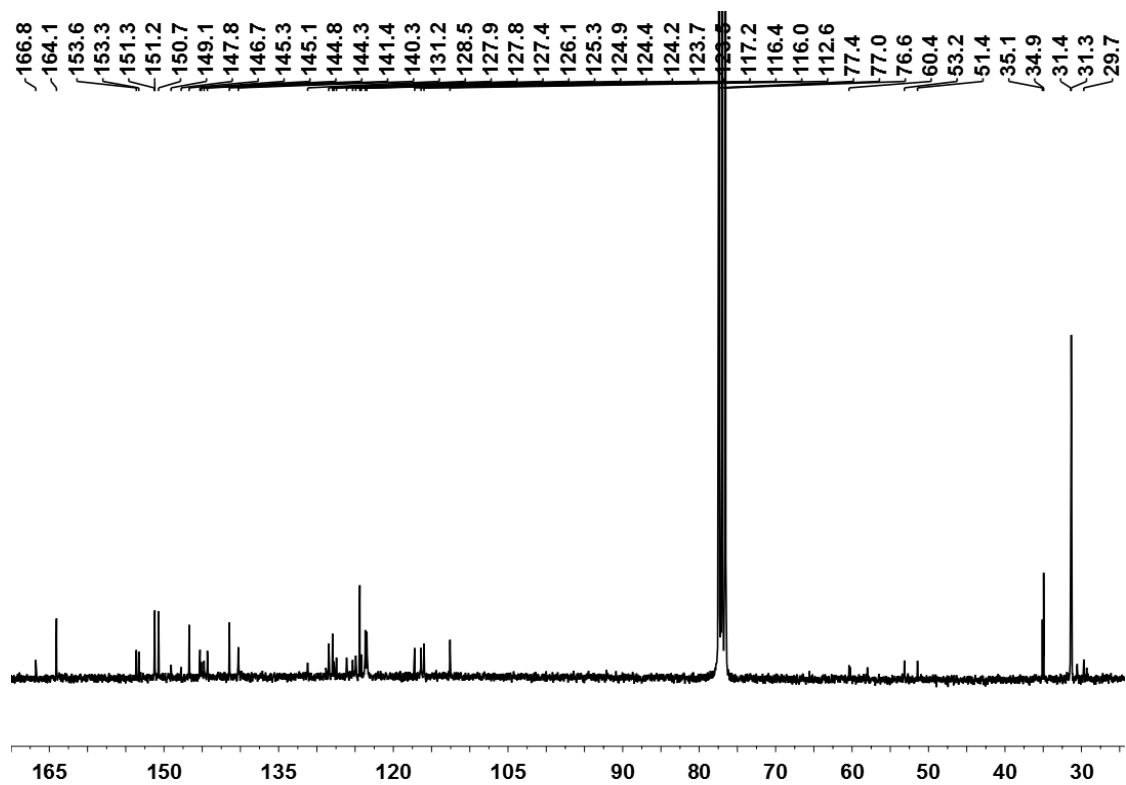

Fig. S10  $^{13}\text{C}$  NMR spectrum (75 MHz,  $\text{CDCl}_3$ ) of **R1a**.

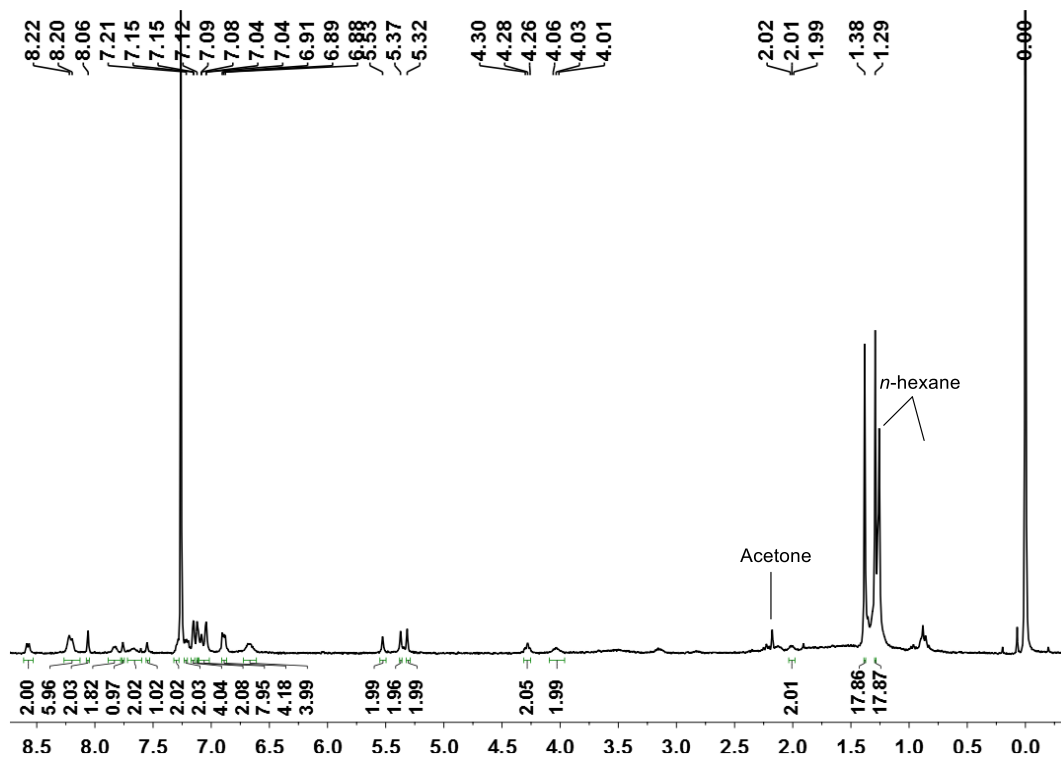

Fig. S11 <sup>1</sup>H NMR spectrum (300 MHz, CDCl<sub>3</sub>) of R1b.

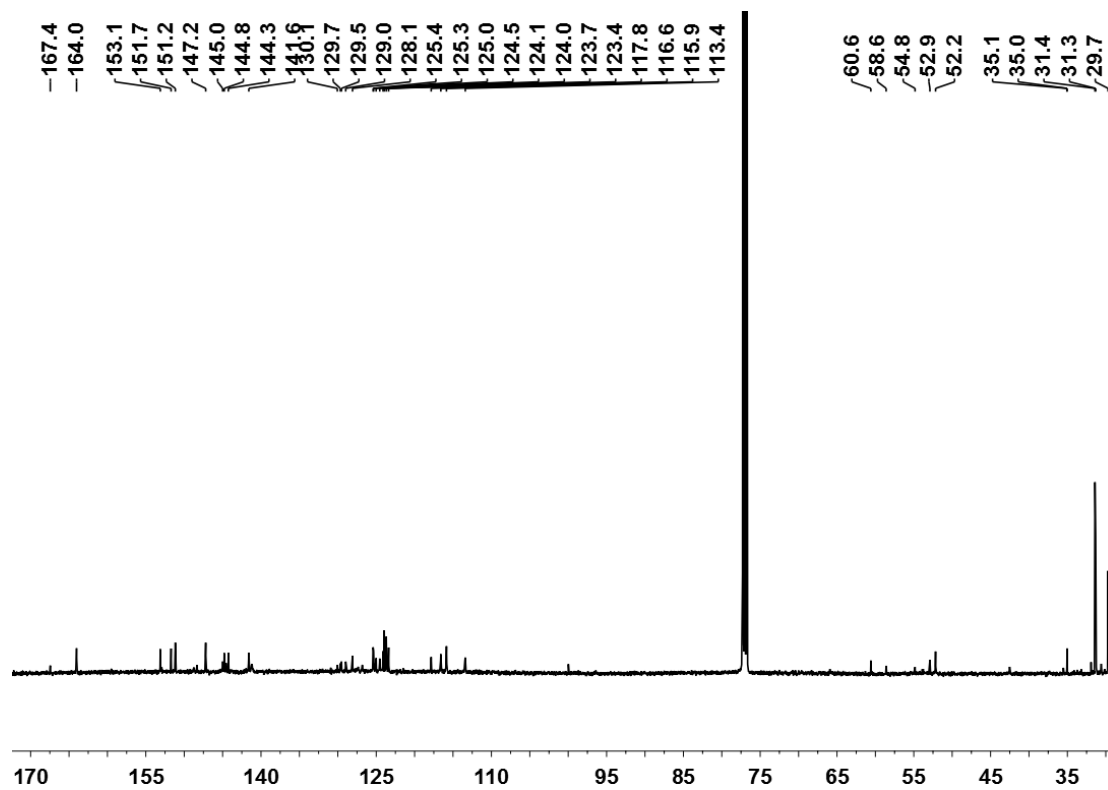

Fig. S12 <sup>13</sup>C NMR spectrum (125 MHz, CDCl<sub>3</sub>) of R1b.

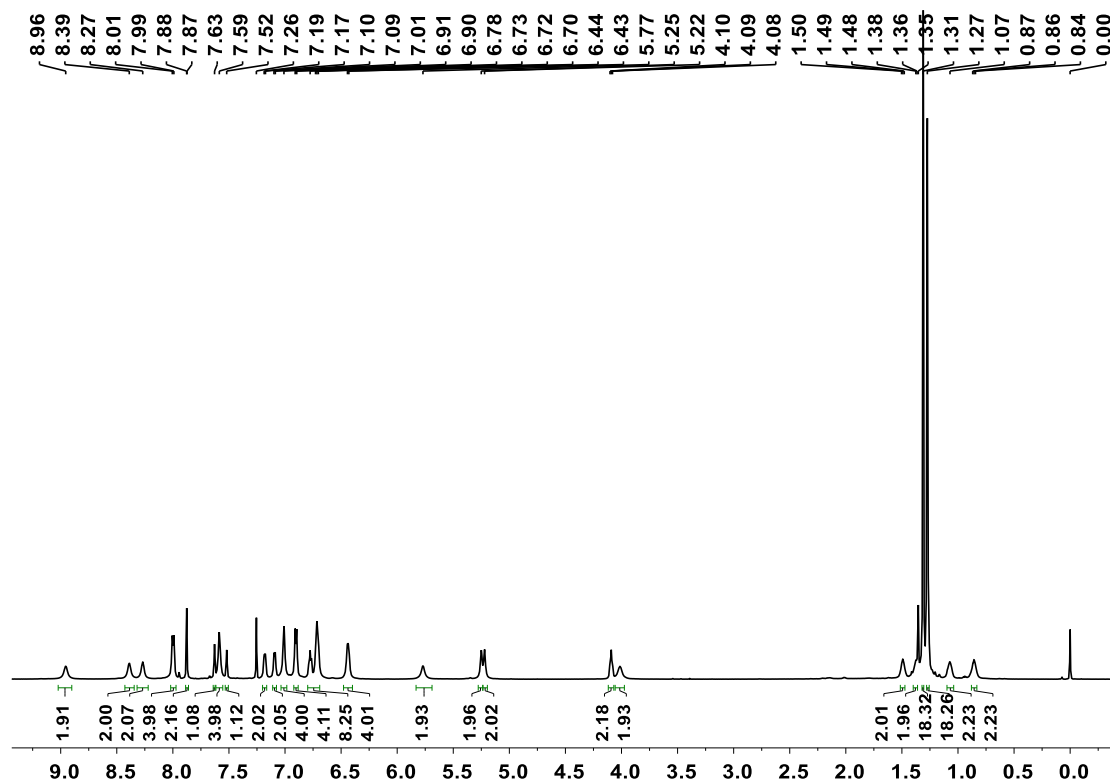

Fig. S13  $^1\text{H}$  NMR spectrum (600 MHz,  $\text{CDCl}_3$ ) of **R2a**.

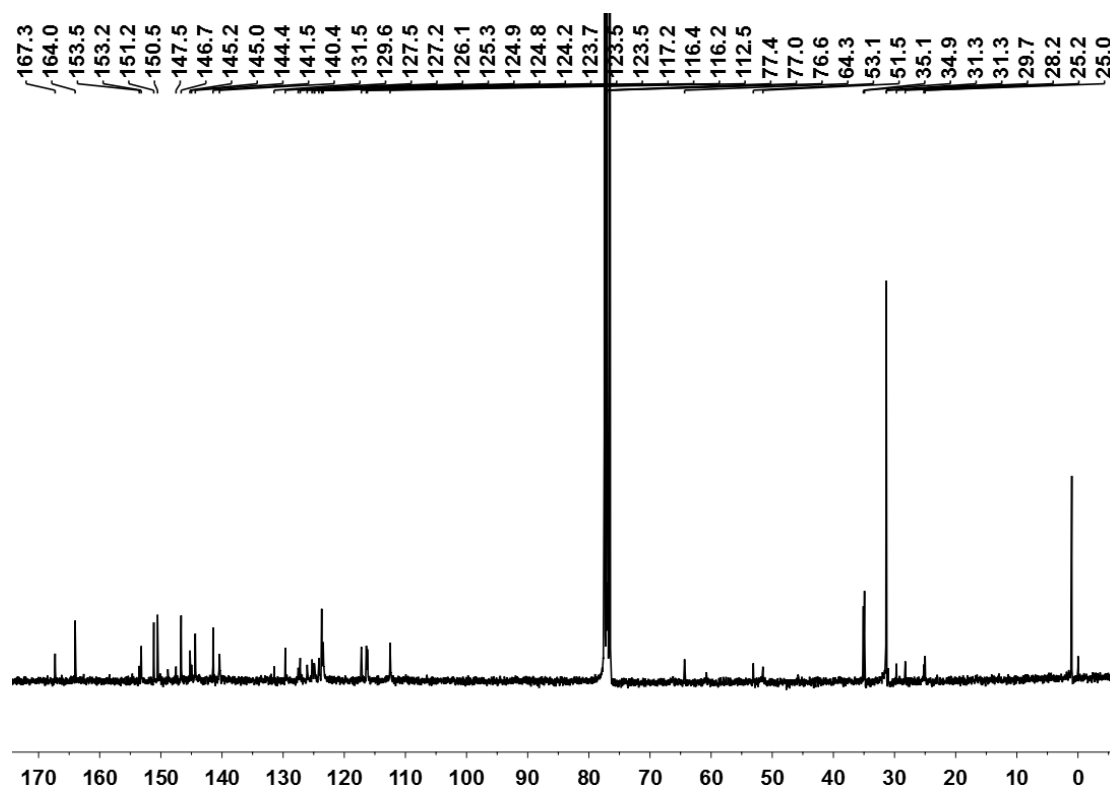

Fig. S14  $^{13}\text{C}$  NMR spectrum (75 MHz,  $\text{CDCl}_3$ ) of **R2a**.

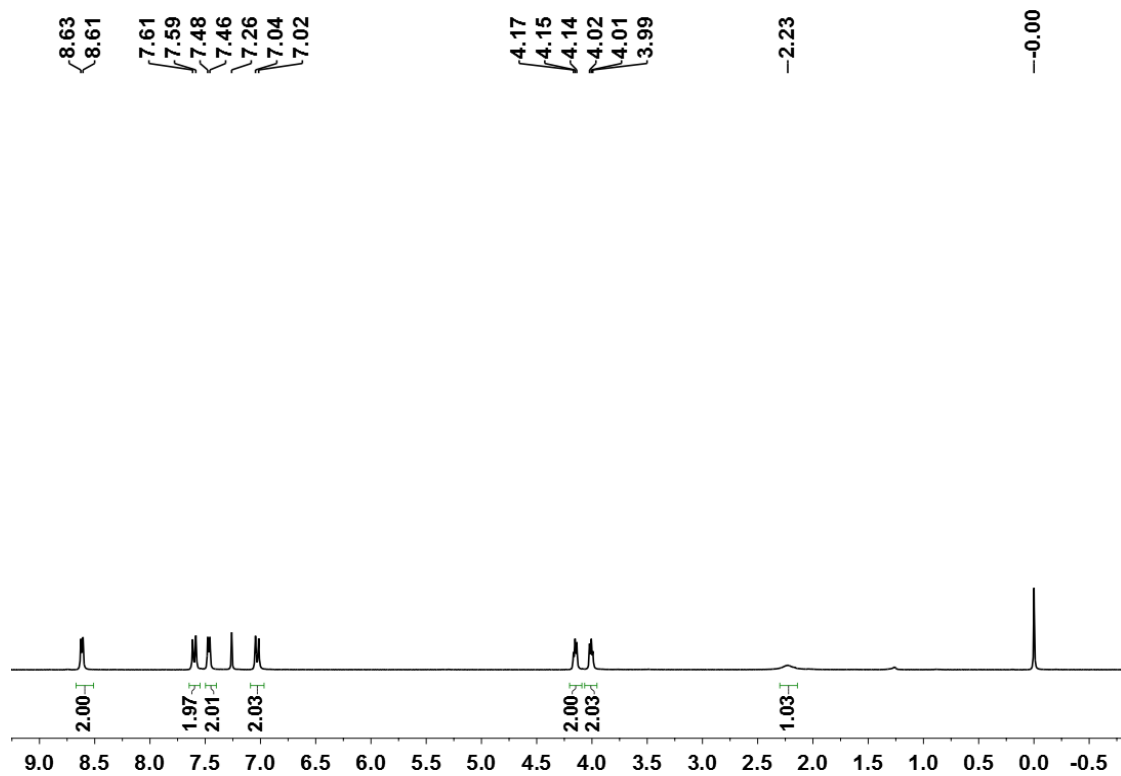

Fig. S15  $^1\text{H}$  NMR spectrum (300 MHz,  $\text{CDCl}_3$ ) of **3**.

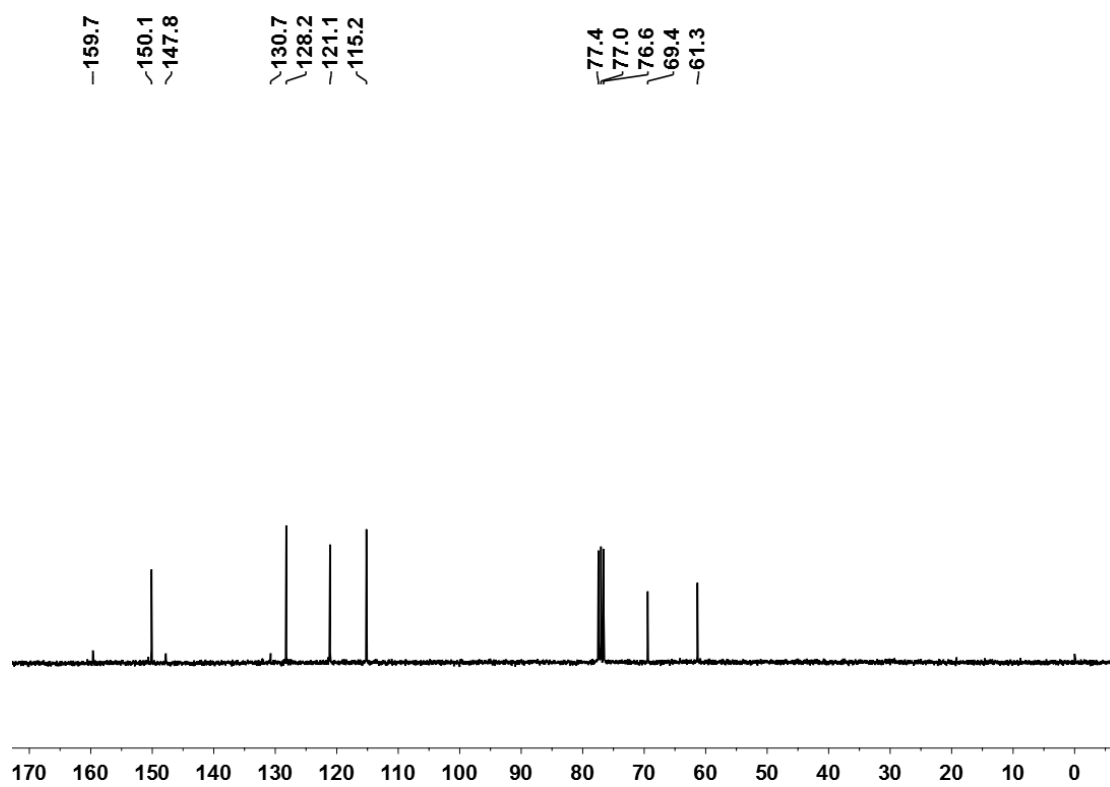

Fig. S16  $^{13}\text{C}$  NMR spectrum (75 MHz,  $\text{CDCl}_3$ ) of **3**.

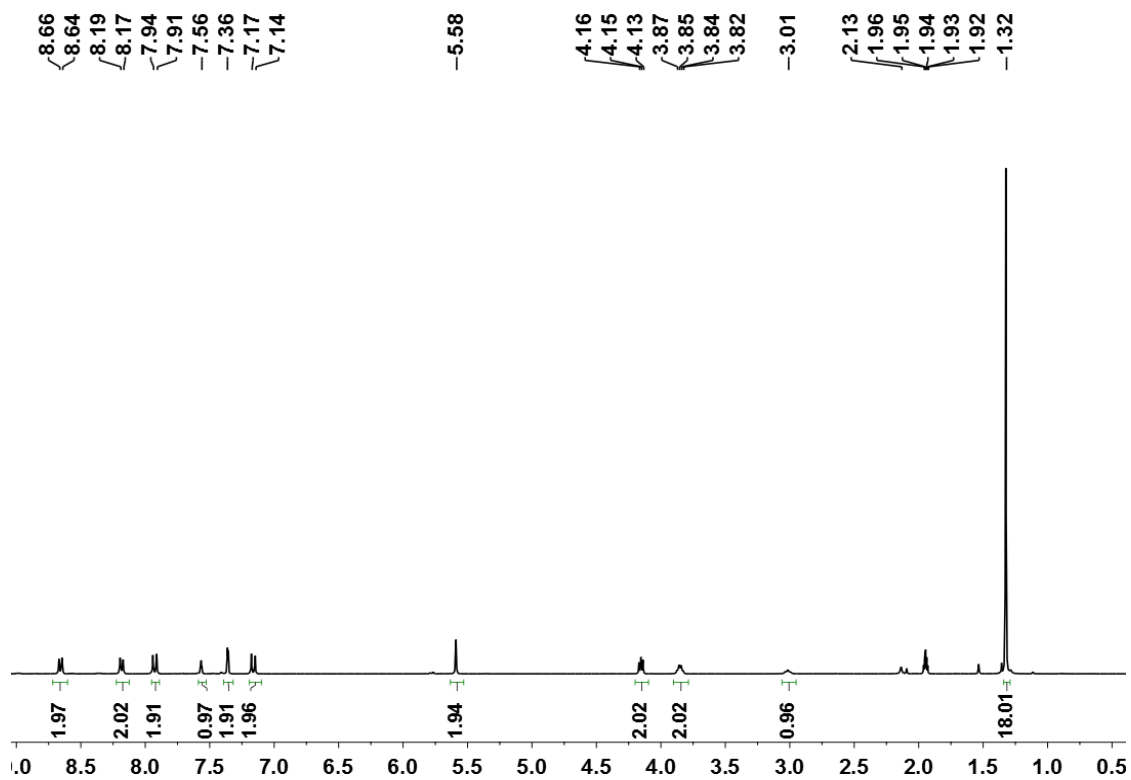

Fig. S17  $^1\text{H}$  NMR spectrum (300 MHz,  $\text{CD}_3\text{CN}$ ) of **G3**.

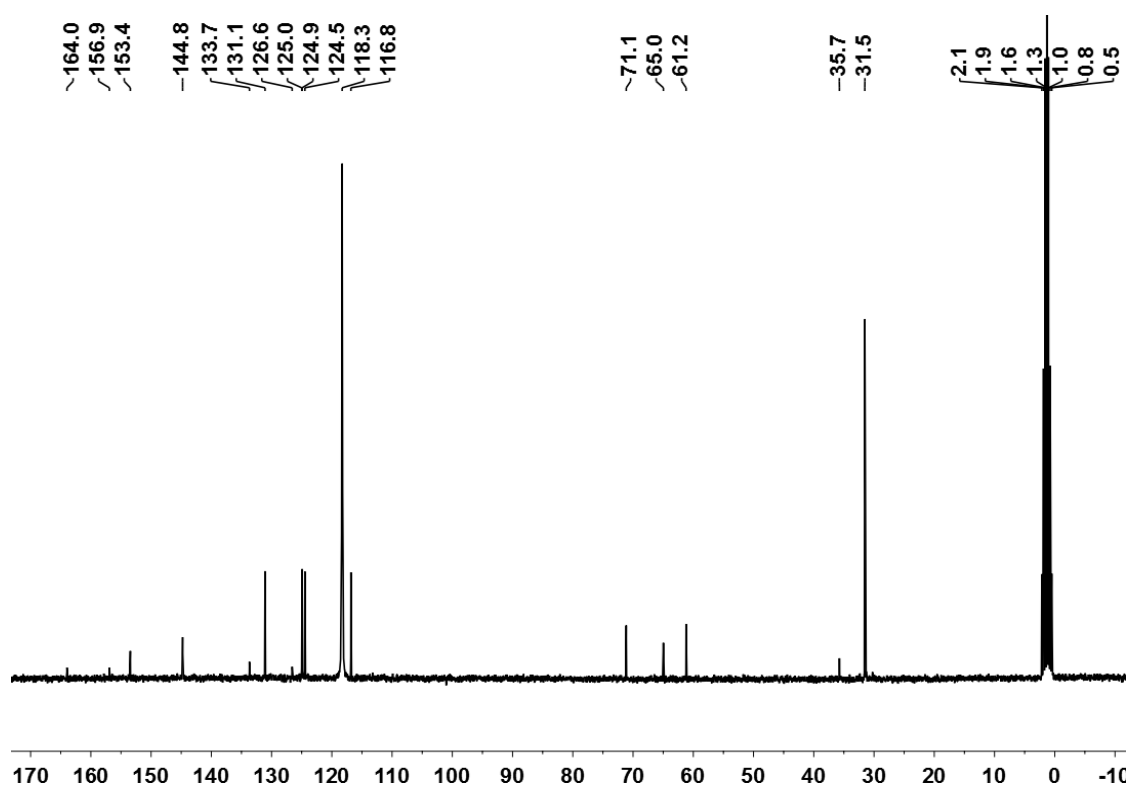

Fig. S18  $^{13}\text{C}$  NMR spectrum (75 MHz,  $\text{CD}_3\text{CN}$ ) of **G3**.



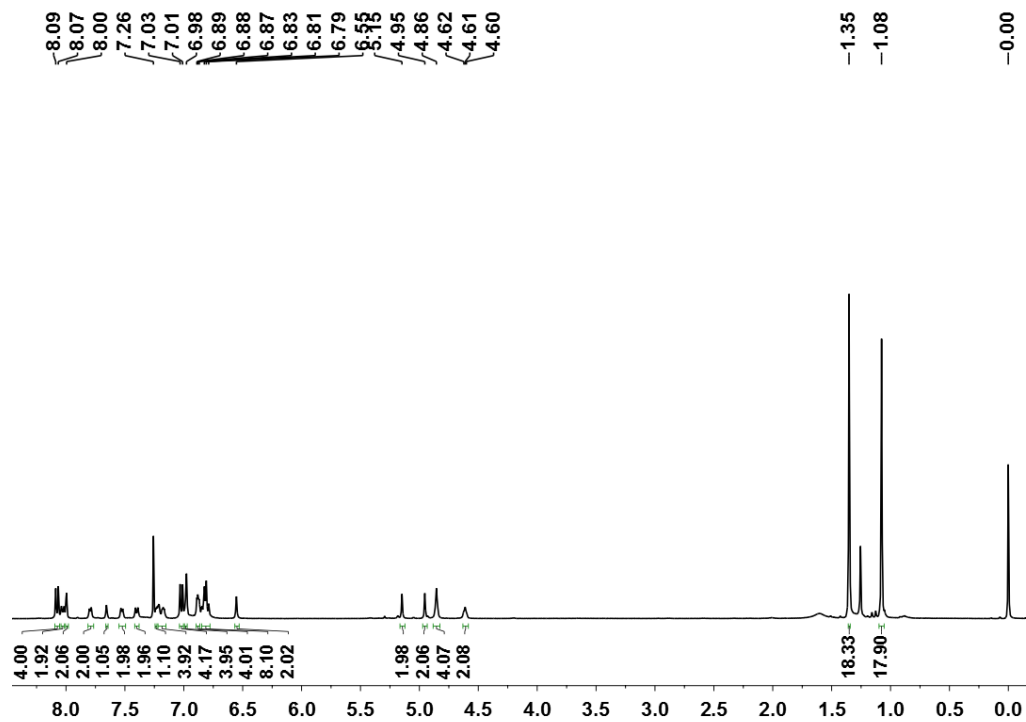

Fig. S19  $^1\text{H}$  NMR spectrum (400 MHz,  $\text{CDCl}_3$ ) of **R3b**.

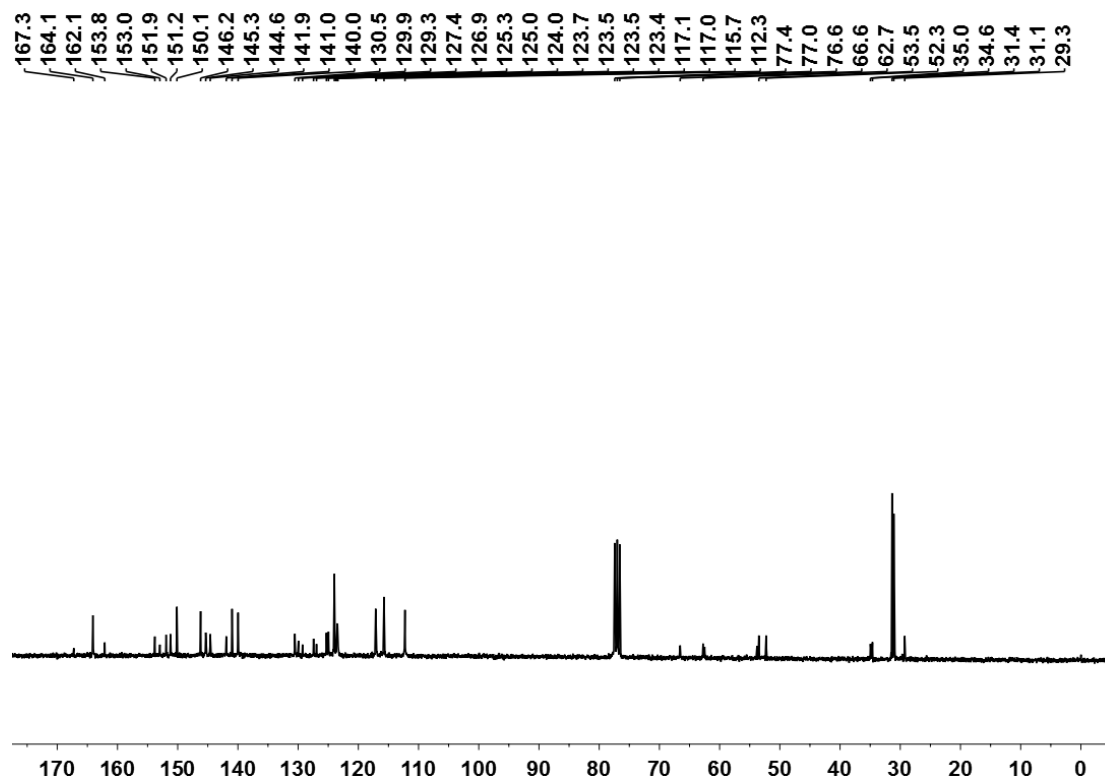

Fig. S20  $^{13}\text{C}$  NMR spectrum (75 MHz,  $\text{CDCl}_3$ ) of **R3b**.

### 3. Copies of 2D NMR spectra of pseudorotaxanes and rotaxanes

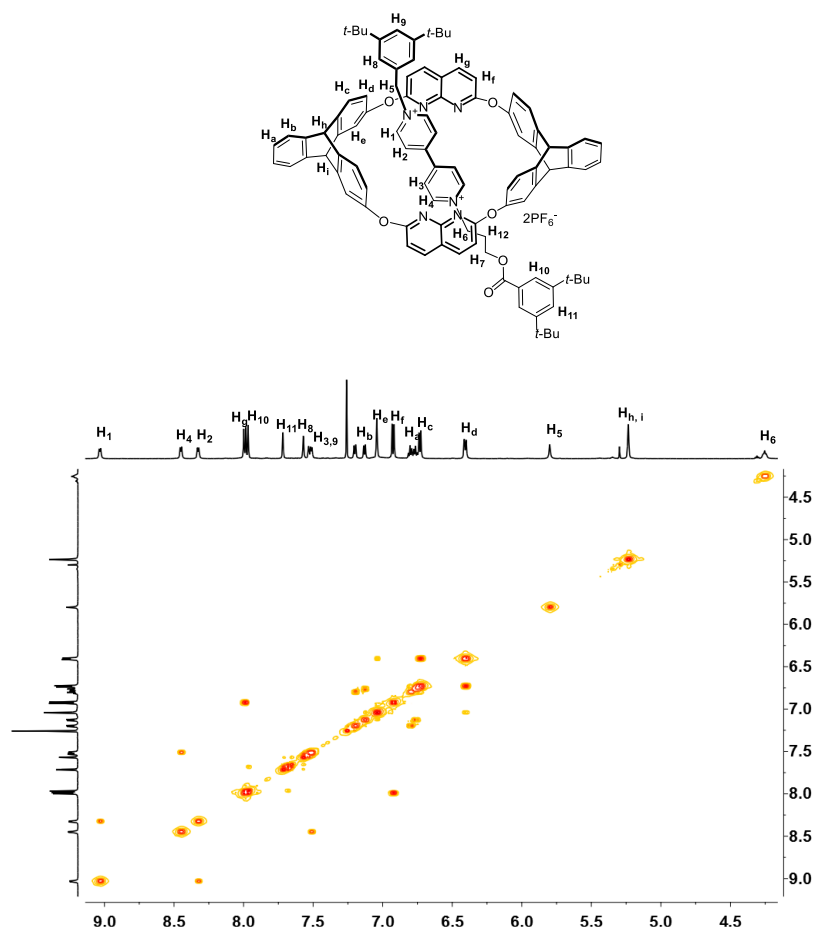

**Fig. S21** Partial COSY spectrum (600 MHz, CDCl<sub>3</sub>) of [2]rotaxane **R1a**.

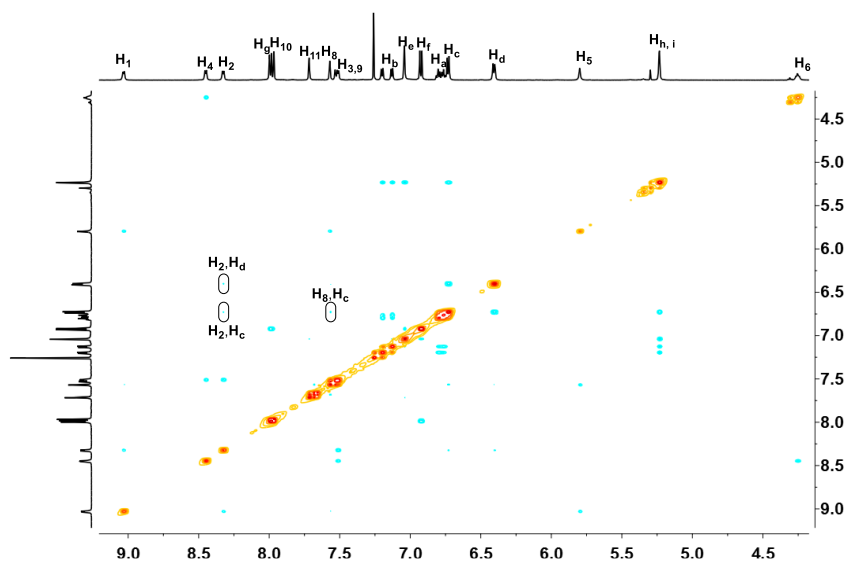

**Fig. S22** Partial ROESY spectrum (600 MHz, CDCl<sub>3</sub>) of [2]rotaxane **R1a**. (correlations denoting the orientation of the host and the guest were marked).

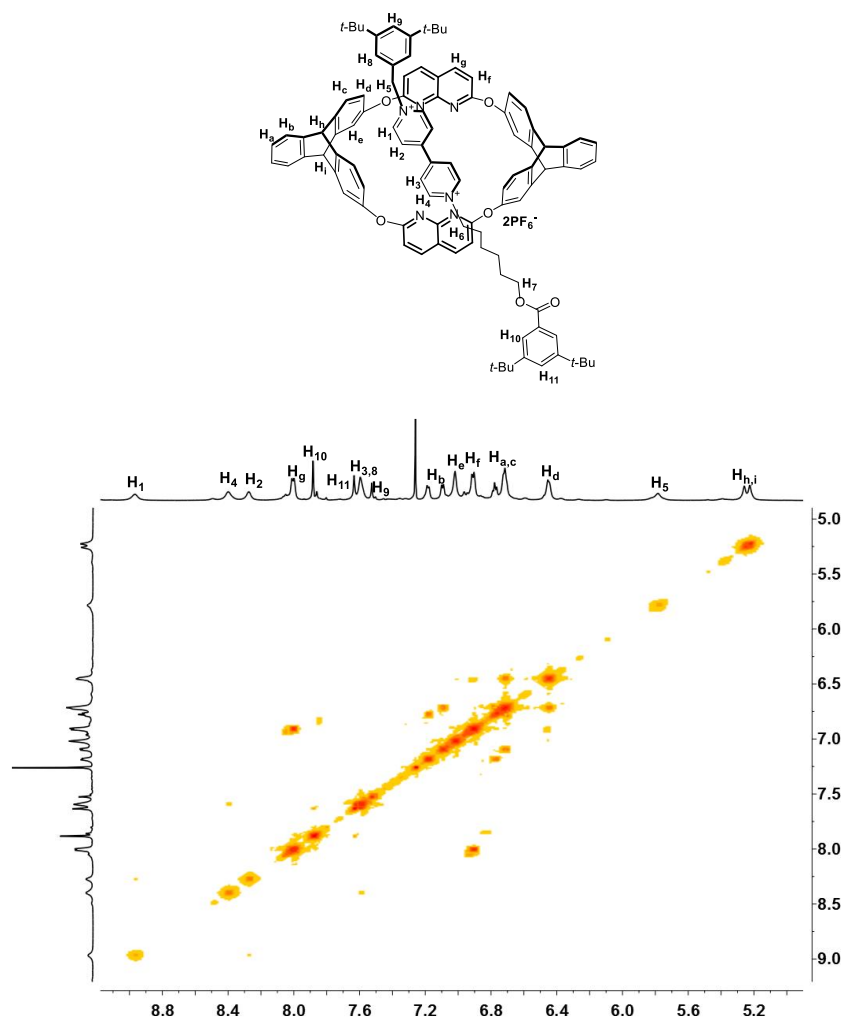

**Fig. S23** Partial COSY spectrum (600 MHz, CDCl<sub>3</sub>) of [2]rotaxane **R2a**.

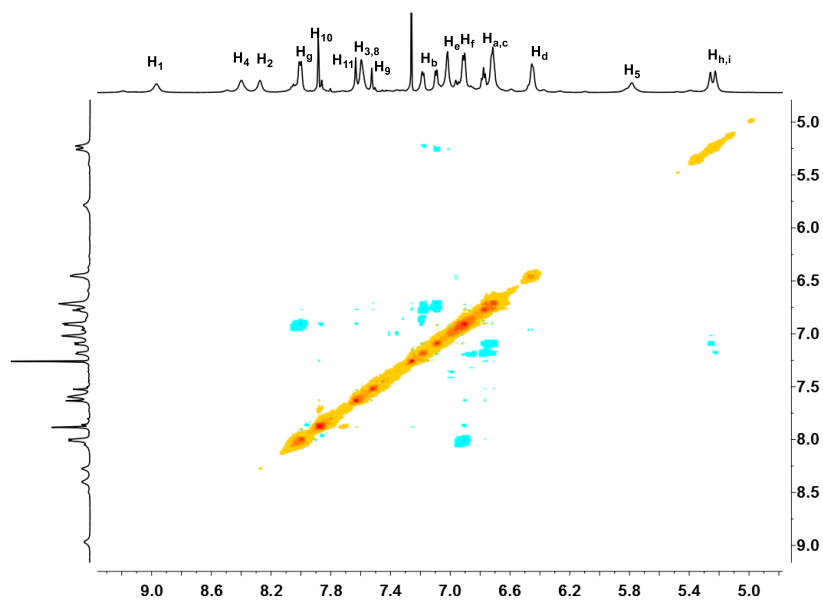

**Fig. S24** Partial ROESY spectrum (600 MHz, CDCl<sub>3</sub>) of [2]rotaxane **R2a**.

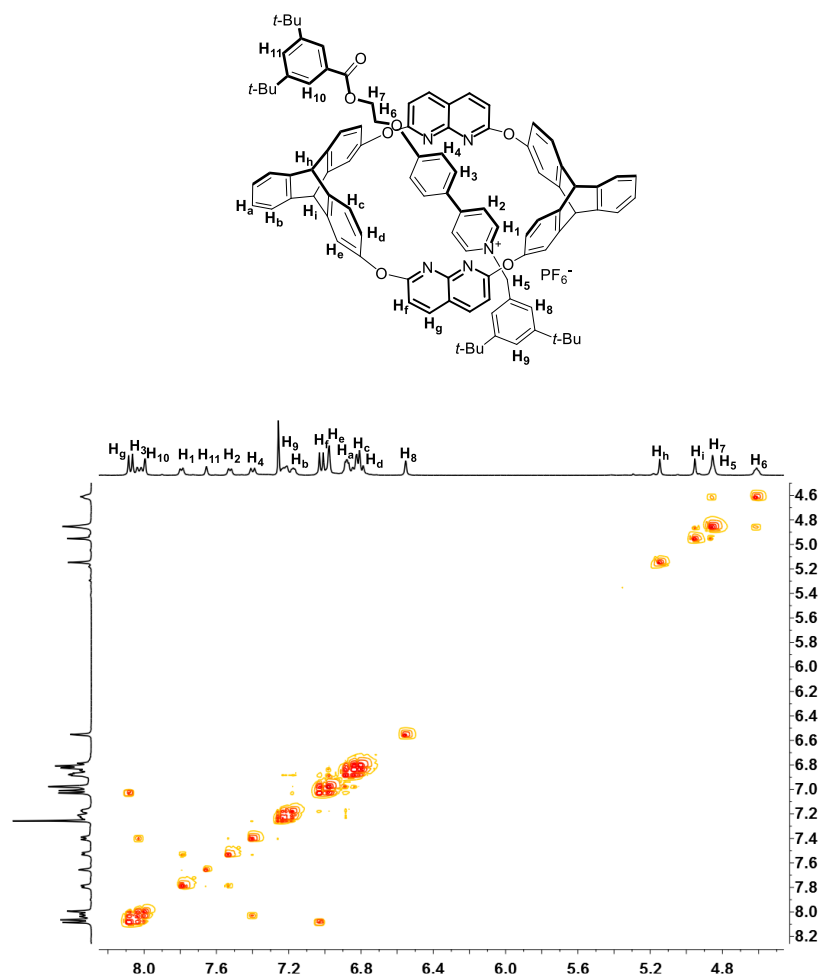

**Fig. S25** Partial COSY spectrum (500 MHz,  $\text{CDCl}_3$ ) of [2]rotaxane **R3b**.

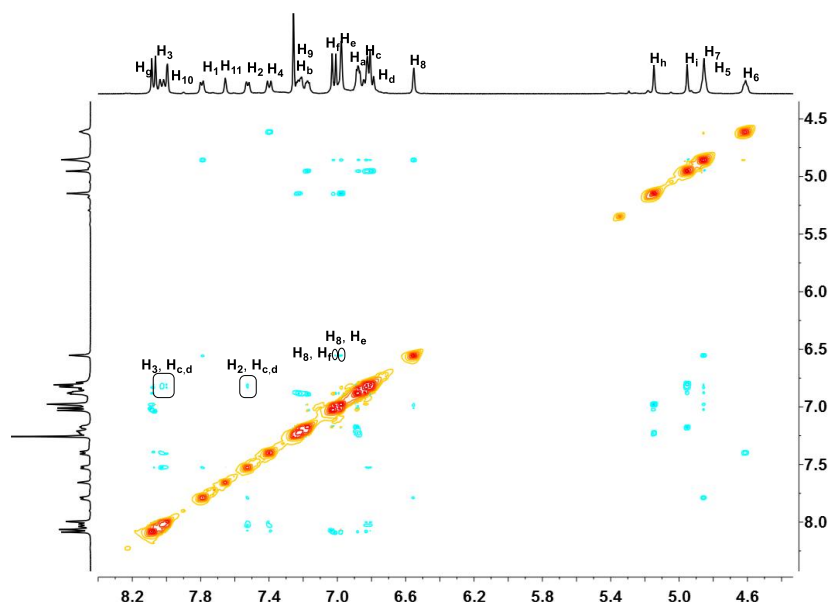

**Fig. S26** Partial ROESY spectrum (500 MHz,  $\text{CDCl}_3$ ) of [2]rotaxane **R3b** (correlations denoting the orientation of the host and the guest were marked).

4. Copies of partial  $^1\text{H}$  NMR spectra showing the ratios of isomers of **R1a-b** or **R2a-b** synthesized under different temperatures

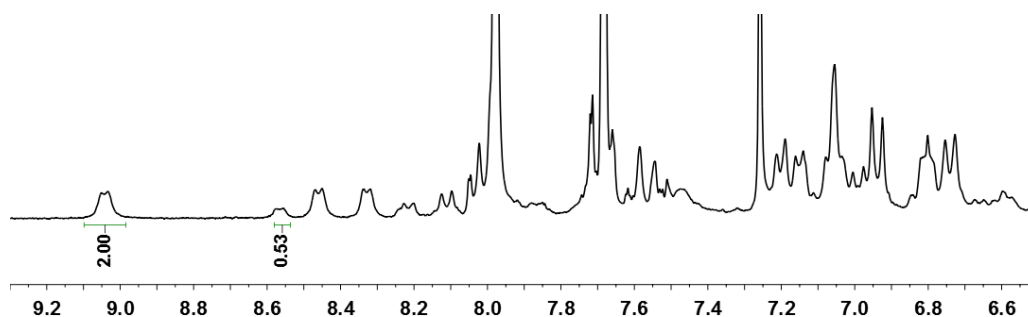

**Fig. S27** Partial  $^1\text{H}$  NMR spectrum (300 MHz,  $\text{CDCl}_3$ ) of the crudely isolated<sup>[4]</sup> mixture of isomers **R1a** and **R1b** synthesized under 298 K.

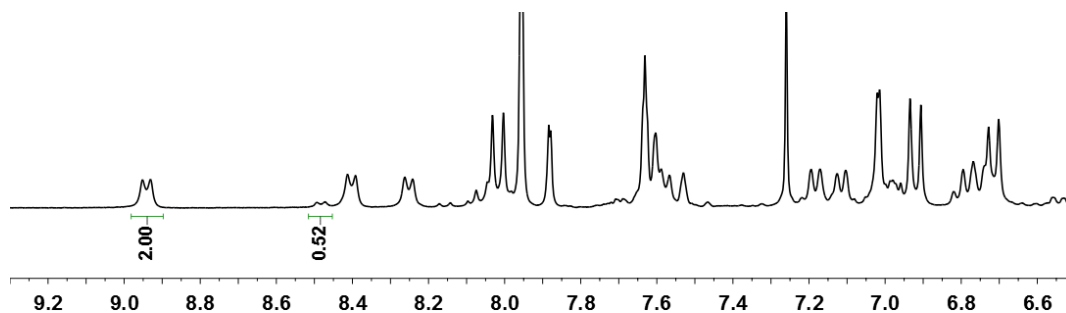

**Fig. S28** Partial  $^1\text{H}$  NMR spectrum (300 MHz,  $\text{CDCl}_3$ ) of the crudely isolated mixture of isomers **R2a** and **R2b** synthesized under 298 K.

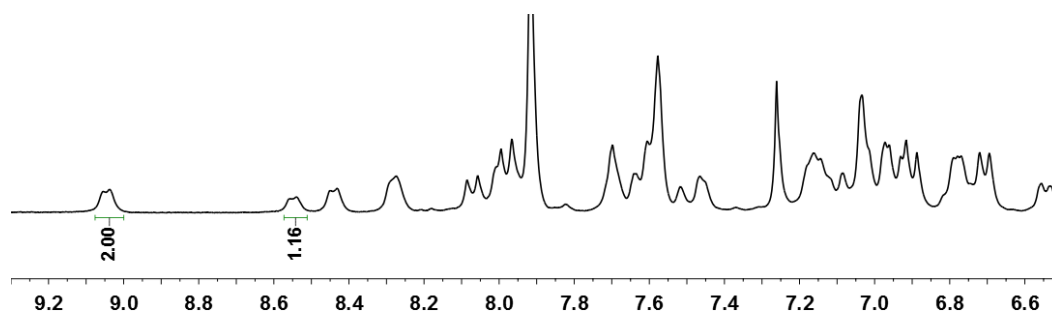

**Fig. S29** Partial  $^1\text{H}$  NMR spectrum (300 MHz,  $\text{CDCl}_3$ ) of the crudely isolated mixture of isomers **R1a** and **R1b** synthesized under 313K.

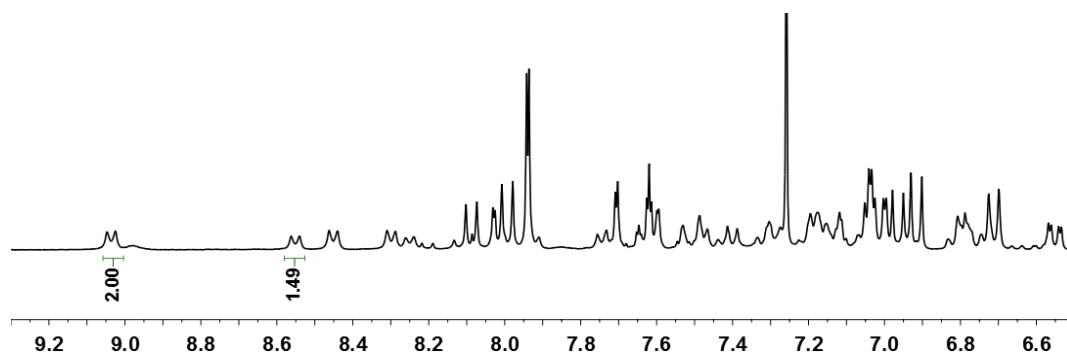

**Fig. S30** Partial  $^1\text{H}$  NMR spectrum (300 MHz,  $\text{CDCl}_3$ ) of the crudely isolated mixture of isomers **R1a** and **R1b** synthesized under 333K.

5.  $^1\text{H}$  NMR spectra of complexation between host **H** and guests **G1-G3**

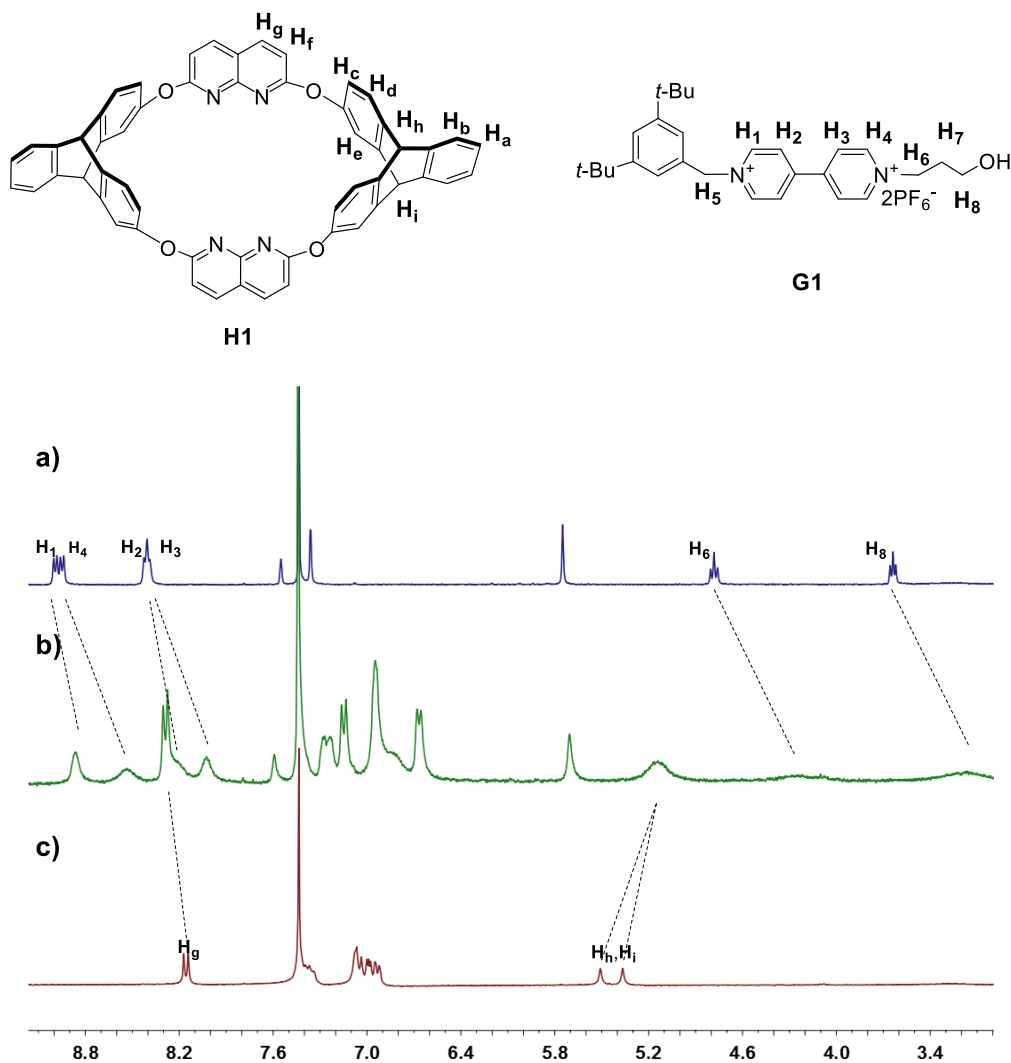

**Fig. S31** Partial  $^1\text{H}$  NMR spectra (300 MHz,  $\text{CDCl}_3/\text{CD}_3\text{CN}$ , 2:1 v/v, 298K) of (a) free host **H**, (b) **H** and 1.0 equiv of **G1**, (c) free guest **G1**.  $[\text{H}]_0 = 3.0$  mM.

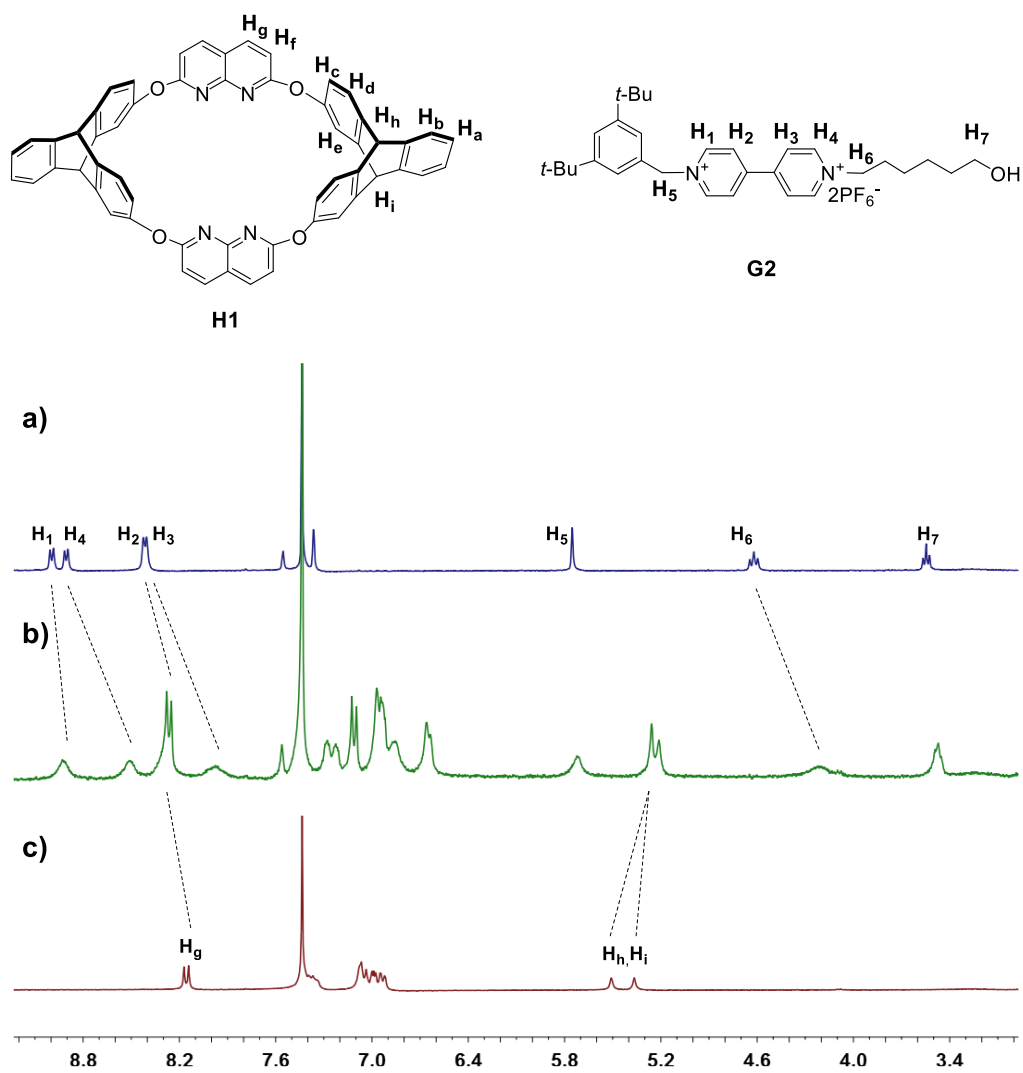

**Fig. S32** Partial  $^1\text{H}$  NMR spectra (300 MHz,  $\text{CDCl}_3/\text{CD}_3\text{CN}$ , 2:1 v/v, 298K) of (a) free host **H**, (b) **H** and 1.0 equiv of **G2**, (c) free guest **G2**.  $[\text{H}]_0 = 3.0$  mM.



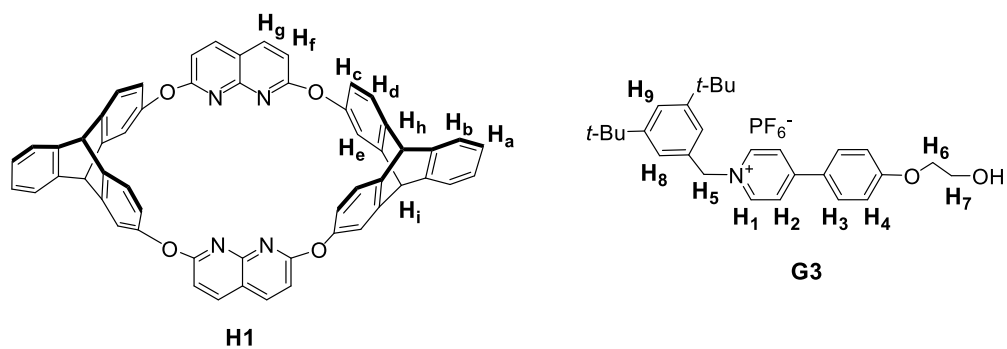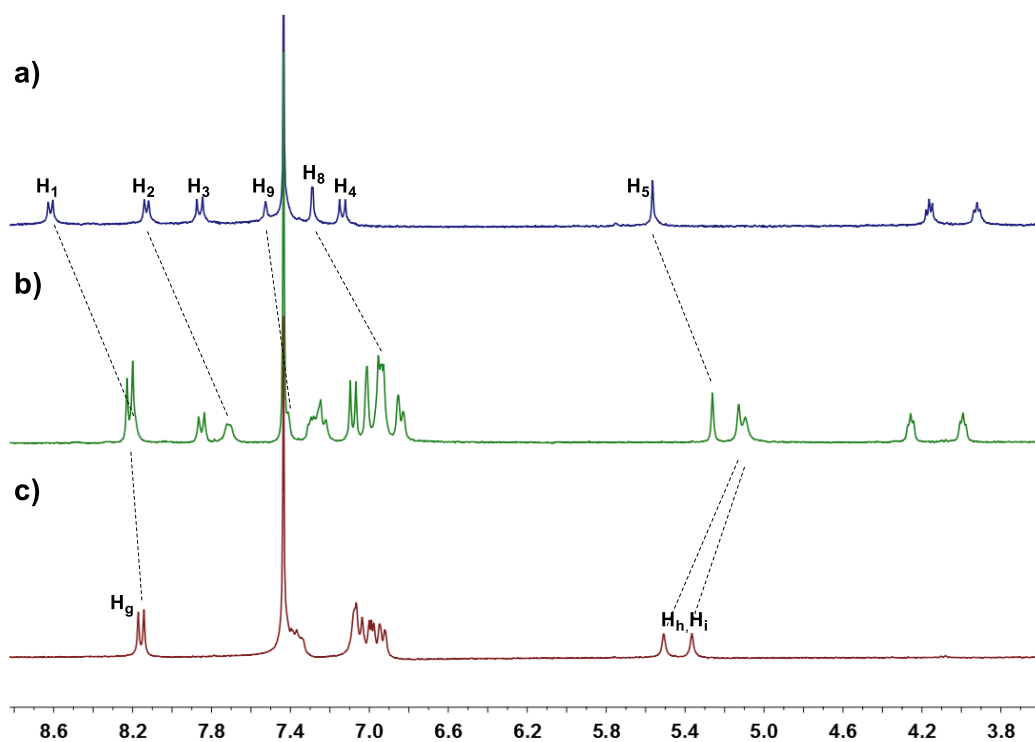

**Fig. S33** Partial  $^1\text{H}$  NMR spectra (300 MHz,  $\text{CDCl}_3/\text{CD}_3\text{CN}$ , 2:1 v/v, 298K) of (a) free host **H**, (b) **H** and 1.0 equiv of **G3**, (c) free guest **G3**.  $[\text{H}]_0 = 3.0$  mM.

## 6. Determination of the stoichiometries and the association constants

To determine the stoichiometries and association constants of **H@G1**, **H@G2** and **H@G3**, <sup>1</sup>H NMR titrations were done. By a nonlinear curve-fitting method, the association constants between the guests and the host were calculated. By a mole ratio plot, the stoichiometry was determined.

The non-linear curve-fitting was based on the equation:

$$\Delta\delta = (a/[H]_0) * (0.5 * [G]_0 + 0.5 * ([H]_0 + 1/K_a) - (0.5 * ([G]_0^2 + (2 * [G]_0 * (1/K_a - [H]_0)) + (1/K_a + [H]_0)^2)^{0.5})) \quad (\text{Eq. S1})$$

Where  $\Delta\delta$  is the chemical shift change of H<sub>d</sub> or H<sub>h</sub> on **H** at  $[G]_0$ , a is the chemical shift change of H<sub>h</sub> when the host is incompletely complexed,  $[H]_0$  is the fixed initial concentration of the host, and  $[G]_0$  is the varying concentration of guests **G1-G3**.

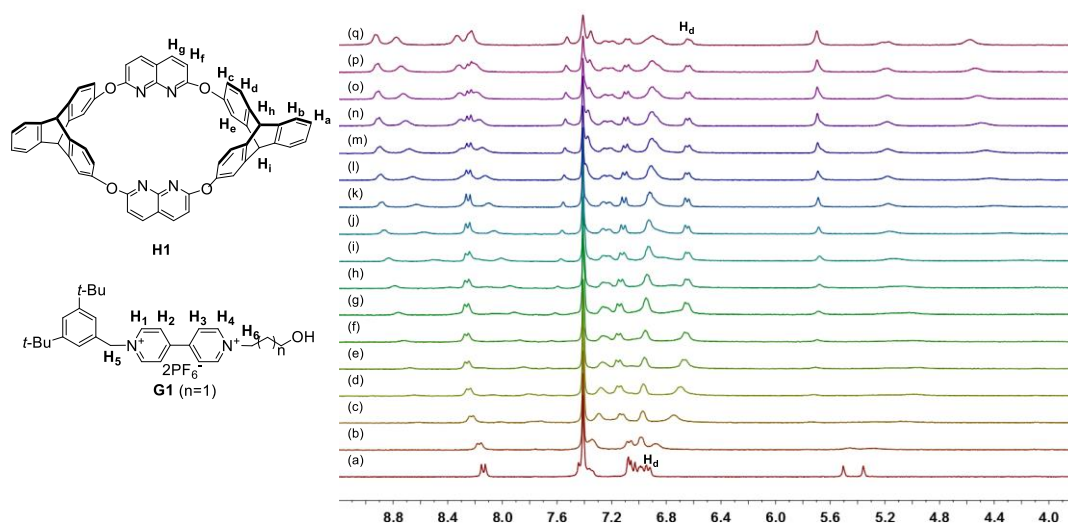

**Fig. S34** <sup>1</sup>H NMR spectra (300 MHz, CDCl<sub>3</sub>/CD<sub>3</sub>CN, 2:1 v/v, 298K) of **H** at a concentration of 3.00 mM with different concentrations of **G1**: (a) 0.00 mM; (b) 1.08 mM; (c) 1.62 mM; (d) 2.16 mM; (e) 2.70 mM; (f) 3.24 mM; (g) 3.78 mM; (h) 4.86 mM; (i) 5.40 mM; (j) 6.48 mM; (k) 7.56 mM; (l) 8.64 mM; (m) 9.72 mM; (n) 10.80 mM; (o) 11.88 mM; (p) 16.20 mM; (q) 21.60 mM.

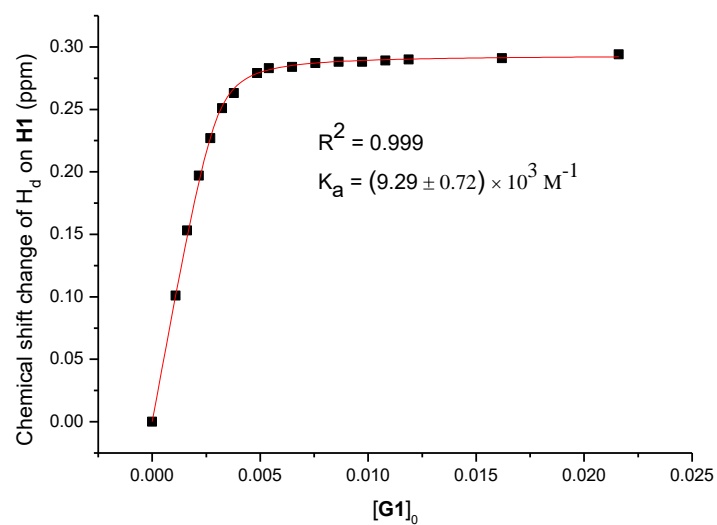

**Fig. S35** The chemical shift changes of  $H_d$  on  $H$  upon the addition of  $G1$ . The red solid line was obtained from the non-linear curve-fitting using Eq. S1.

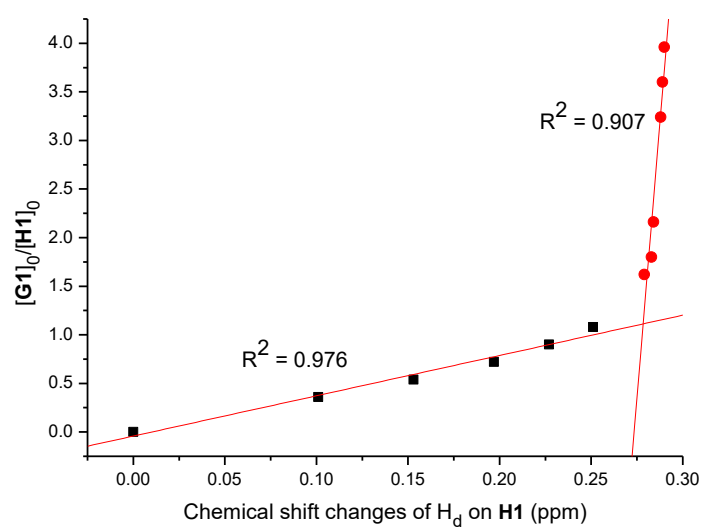

**Fig. S36** Mole ratio plot for the complexation between  $H$  and  $G1$ , indicating a 1:1 stoichiometry.

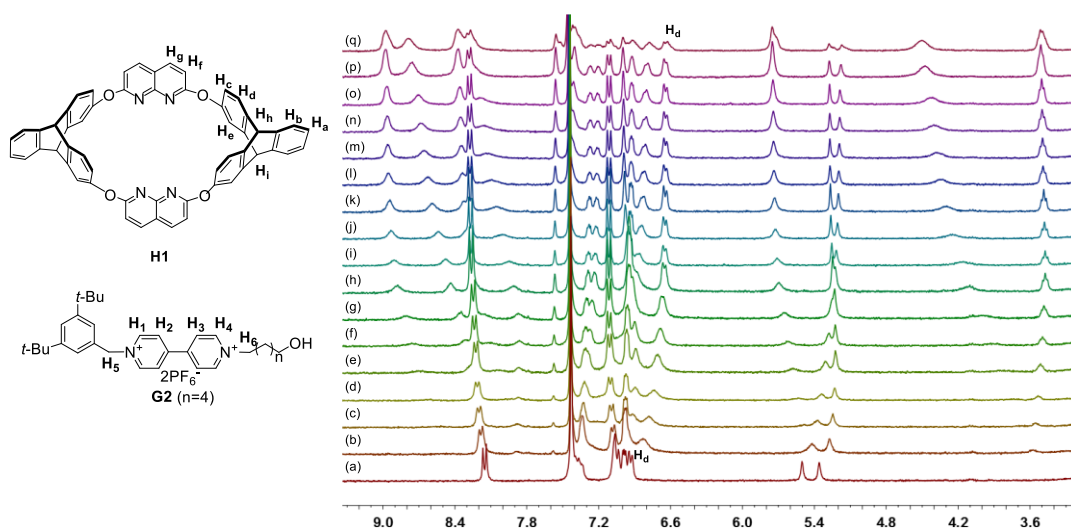

**Fig. S37**  $^1\text{H}$  NMR spectra (300 MHz,  $\text{CDCl}_3/\text{CD}_3\text{CN}$ , 2:1 v/v, 298K) of **H** at a concentration of 2.80 mM with different concentrations of **G2**: (a) 0.00 mM; (b) 0.98 mM; (c) 1.47 mM; (d) 1.96 mM; (e) 2.45 mM; (f) 2.93 mM; (g) 3.42 mM; (h) 4.40 mM; (i) 4.89 mM; (j) 5.87 mM; (k) 6.85 mM; (l) 7.82 mM; (m) 8.80 mM; (n) 9.78 mM; (o) 10.76 mM; (p) 14.67 mM; (q) 19.56 mM.

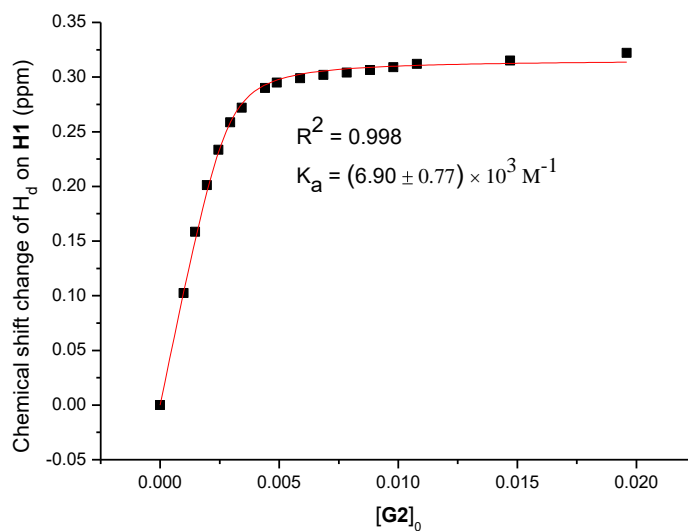

**Fig. S38** The chemical shift changes of  $\text{H}_d$  on **H** upon the addition of **G2**. The red solid line was obtained from the non-linear curve-fitting using Eq. S1.

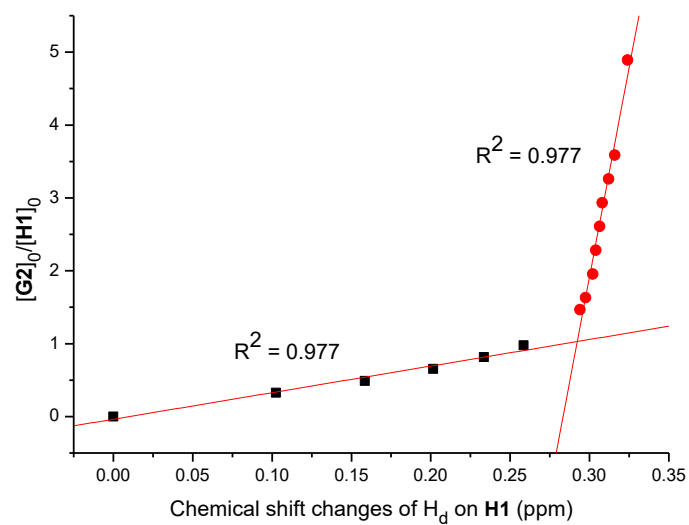

**Fig. S39** Mole ratio plot for the complexation between **H** and **G2**, indicating a 1:1 stoichiometry.

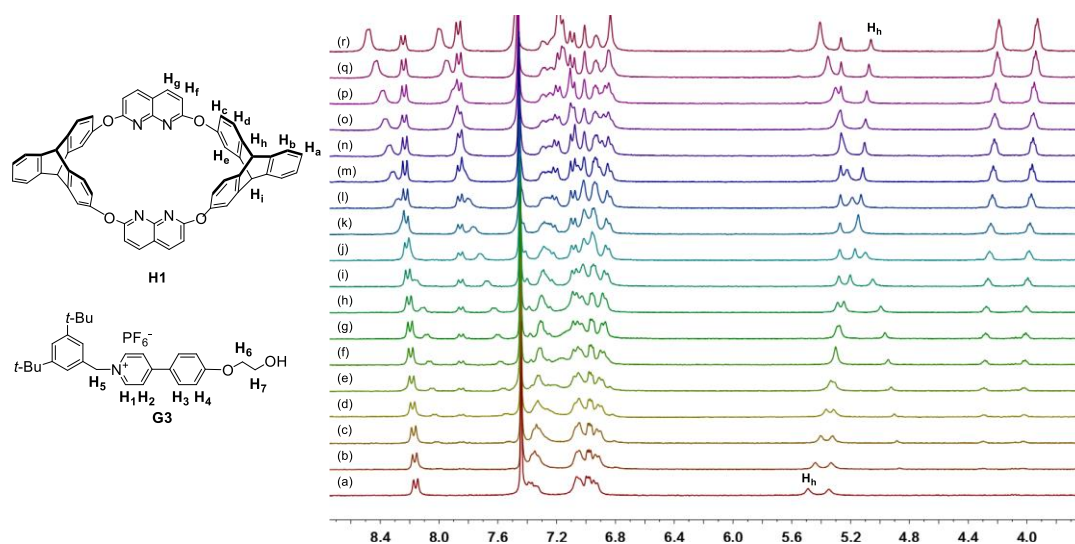

**Fig. S40**  $^1\text{H}$  NMR spectra (300 MHz,  $\text{CDCl}_3/\text{CD}_3\text{CN}$ , 2:1 v/v, 298K) of **H** at a concentration of 3.00 mM with different concentrations of **G3**: (a) 0.00 mM; (b) 0.60 mM; (c) 0.90 mM; (d) 1.20 mM; (e) 1.50 mM; (f) 1.80 mM; (g) 2.10 mM; (h) 2.40 mM; (i) 3.00 mM; (j) 3.60 mM; (k) 4.20 mM; (l) 4.80 mM; (m) 5.40 mM; (n) 6.00 mM; (o) 6.60 mM; (p) 7.20 mM; (q) 9.00 mM.

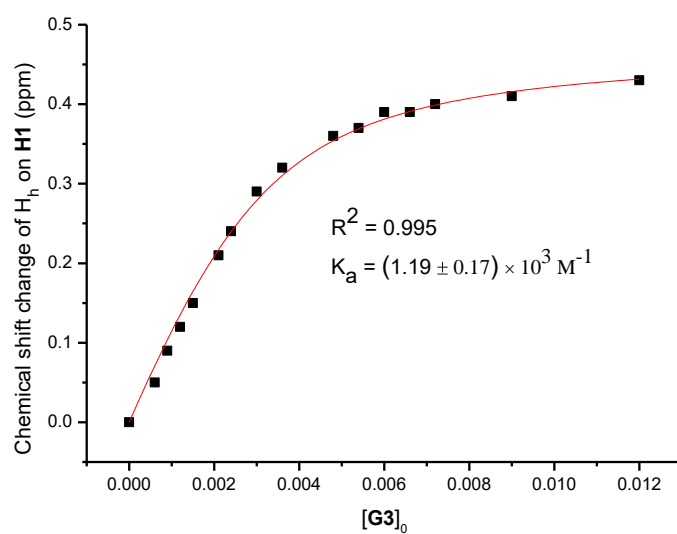

**Fig. S41** The chemical shift changes of  $H_h$  on  $H$  upon the addition of  $G3$ . The red solid line was obtained from the non-linear curve-fitting using Eq. S1.

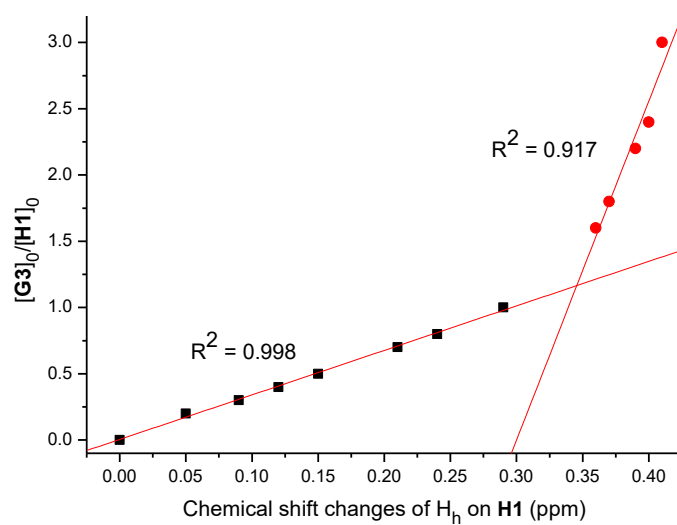

**Fig. S42** Mole ratio plot for the complexation between  $H$  and  $G3$ , indicating a 1:1 stoichiometry.

## 7. Variable-temperature $^1\text{H}$ NMR spectra of H@G3 and G3.

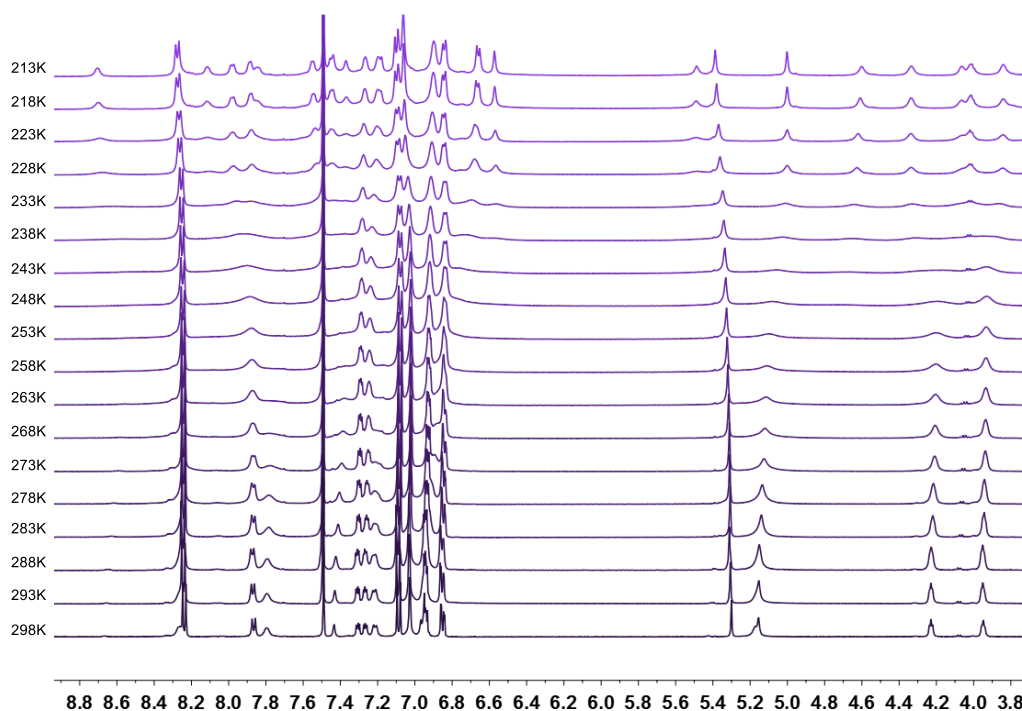

**Fig. S43** Variable-temperature  $^1\text{H}$  NMR spectra of **H@G3** (1:1.5, 500 MHz,  $\text{CDCl}_3/\text{CD}_3\text{CN}$ , 1:1 v/v).  $[\text{H}]_0 = 3.0$  mM.

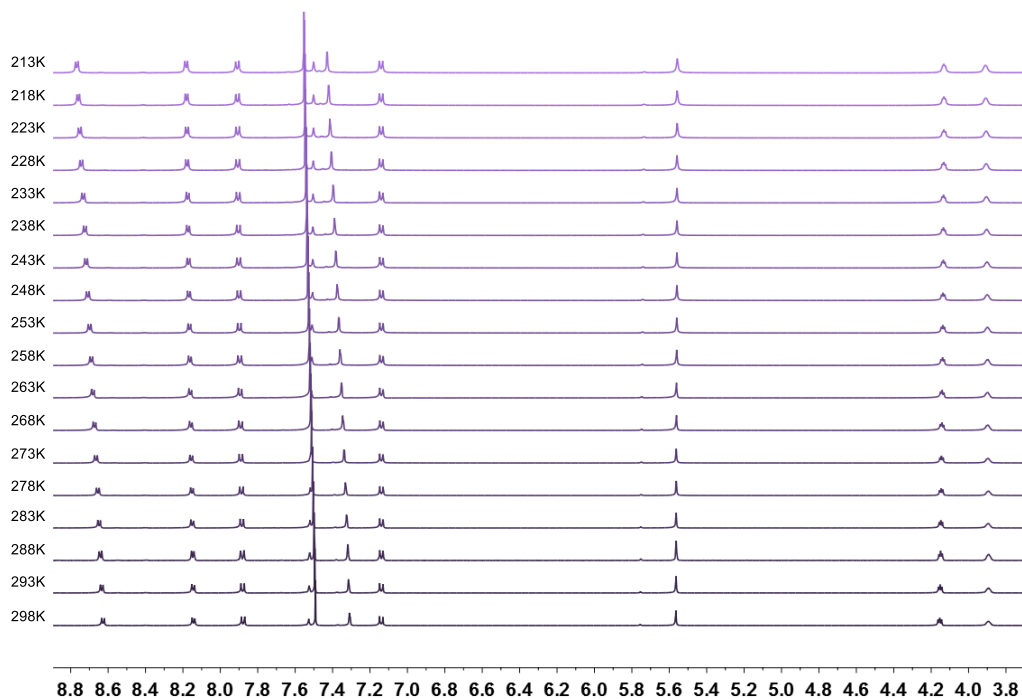

**Fig. S44** Variable-temperature  $^1\text{H}$  NMR spectra of **G3** (500 MHz,  $\text{CDCl}_3/\text{CD}_3\text{CN}$ , 1:1 v/v).  $[\text{G3}]_0 = 4.5$  mM.

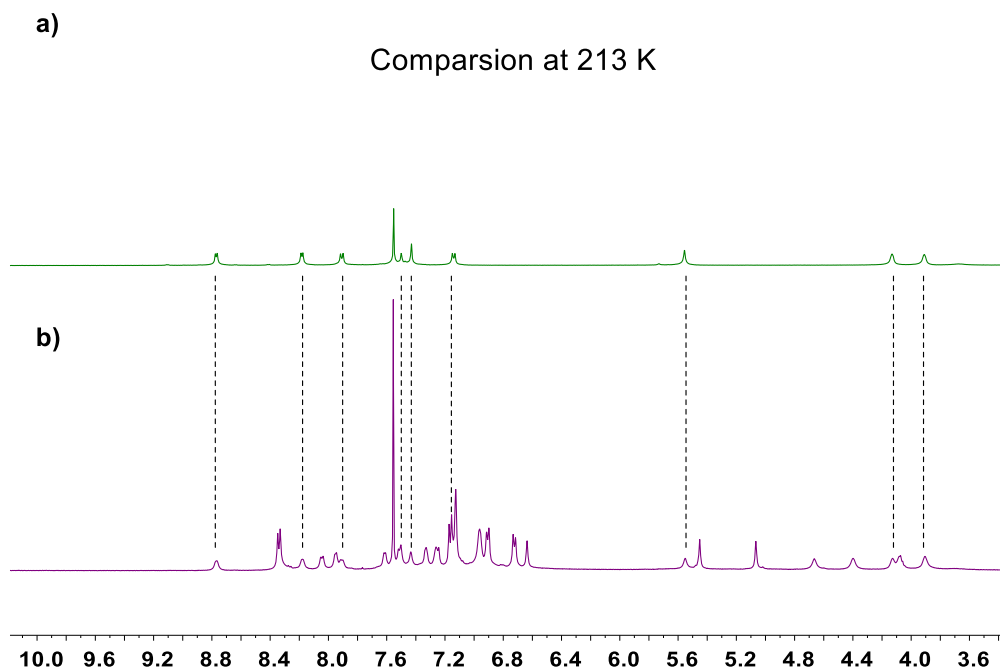

**Fig. S45** Comparison of  $^1\text{H}$  NMR spectra of a) **G3** (500 MHz,  $\text{CDCl}_3/\text{CD}_3\text{CN}$ , 1:1 v/v), and b) **H@G3** (1:1.5, 500 MHz,  $\text{CDCl}_3/\text{CD}_3\text{CN}$ , 1:1 v/v) at 213K.  $[\text{H}]_0 = 3.0$  mM,  $[\text{G3}]_0 = 4.5$  mM.



## 7. Crystal data

X-ray structural determination of pseudorotaxane **PR1a**, rotaxanes **R1a** and **R3b**: CCDC 1009829 (**PR1a**), CCDC 1009830 (**R1a**) and CCDC 1419743 (**R3b**) contain the supplementary crystallographic data for this paper. These data can be obtained free of charge via [www.ccdc.cam.ac.uk/conts/retrieving.html](http://www.ccdc.cam.ac.uk/conts/retrieving.html) (or from the Cambridge Crystallographic Data Centre, 12 Union Road, Cambridge CB21EZ, UK; fax: +44 1223 336 033; or [deposit@ccdc.cam.ac.uk](mailto:deposit@ccdc.cam.ac.uk)).

**Crystal data for PR1a:**  $C_8H_7Cl_4F_{12}N_6O_5P_2$ ,  $M_w = 1703.25$ , monoclinic, space group  $P 21/n$ ,  $a = 11.1928(19) \text{ \AA}$ ,  $b = 21.893(4) \text{ \AA}$ ,  $c = 32.961(6) \text{ \AA}$ ,  $\alpha = 90^\circ$ ,  $\beta = 92.044(3)^\circ$ ,  $\gamma = 90^\circ$ ,  $V = 8072(2) \text{ \AA}^3$ ,  $Z = 4$ ,  $D = 1.402 \text{ Mg m}^{-3}$ ,  $T = 173(2) \text{ K}$ , 54637 reflections measured, 18426 unique ( $R_{\text{int}} = 0.0616$ ), final  $R$  indices [ $I > 2\sigma(I)$ ]:  $R_1 = 0.1285$ ,  $wR_2 = 0.3020$ ,  $R$  indices (all data):  $R_1 = 0.1526$ ,  $wR_2 = 0.3181$ .

**Crystal data for R1a:**  $C_{106}H_{97}Cl_{21}F_{12}N_6O_6P_2$ ,  $M_w = 2585.28$ , triclinic, space group  $P-1$ ,  $a = 11.354(2) \text{ \AA}$ ,  $b = 17.925(4) \text{ \AA}$ ,  $c = 30.835(6) \text{ \AA}$ ,  $\alpha = 103.44(3)^\circ$ ,  $\beta = 93.42(3)^\circ$ ,  $\gamma = 103.76(3)^\circ$ ,  $V = 5885(2) \text{ \AA}^3$ ,  $Z = 2$ ,  $D = 1.459 \text{ Mg m}^{-3}$ ,  $T = 173(2) \text{ K}$ , 52898 reflections measured, 26219 unique ( $R_{\text{int}} = 0.0690$ ), final  $R$  indices [ $I > 2\sigma(I)$ ]:  $R_1 = 0.1055$ ,  $wR_2 = 0.2671$ ,  $R$  indices (all data):  $R_1 = 0.1317$ ,  $wR_2 = 0.2908$ .

**Crystal data for R3b:**  $C_{99}H_{88}F_6N_5O_7P$ ,  $M_w = 1604.71$ , tetragonal, space group  $I 41/a$ ,  $a = 33.379(5) \text{ \AA}$ ,  $b = 33.379(5) \text{ \AA}$ ,  $c = 40.257(8) \text{ \AA}$ ,  $\alpha = 90^\circ$ ,  $\beta = 90^\circ$ ,  $\gamma = 90^\circ$ ,  $V = 44854(16) \text{ \AA}^3$ ,  $Z = 16$ ,  $D = 0.951 \text{ Mg m}^{-3}$ ,  $T = 173(2) \text{ K}$ , 136082 reflections measured, 20189 unique ( $R_{\text{int}} = 0.0715$ ), final  $R$  indices [ $I > 2\sigma(I)$ ]:  $R_1 = 0.1781$ ,  $wR_2 = 0.4830$ ,  $R$  indices (all data):  $R_1 = 0.1898$ ,  $wR_2 = 0.4905$ .<sup>[5]</sup>

## 9. Computational methods

All DFT calculations were carried out with Gaussian 09 program<sup>[6]</sup> using B3LYP hybrid functional<sup>[7]</sup>. Geometries were fully optimized in gas phase consistently employing polarized double- $\zeta$  def2-SVP basis set<sup>[8]</sup> on all atoms, with Grimme's DFT-D3<sup>[9]</sup> empirical dispersion correction (with zero short range damping). Energies in chloroform solution were calculated as single-point energies from optimized structures using larger polarized triple- $\zeta$  def2-TZVP basis set<sup>[7]</sup> and SMD continuum solvation field.<sup>[10]</sup> Reported energies (in kcal/mol) are Gibbs free energies, including thermal free energy correction, solvent effect correction, and DFT-D3 empirical dispersion correction.

## 10. Cartesian Coordinates of Computed Structures

| <b>H@G1 (major isomer, PR1a)</b> |             |            |             | C | 5.63788600 | 2.82400000  | 19.50094300 |
|----------------------------------|-------------|------------|-------------|---|------------|-------------|-------------|
|                                  |             |            |             | H | 5.73408700 | 1.75286400  | 19.32776200 |
| O                                | 11.88461900 | 6.35427600 | 17.83524000 | C | 4.18901400 | 4.60288200  | 19.98020200 |
| H                                | 11.69097500 | 5.59557700 | 17.26757500 | H | 3.16086700 | 4.91379100  | 20.16889100 |
| N                                | 9.98842300  | 7.53043700 | 19.78186000 | C | 5.25129700 | 5.49340200  | 20.01533500 |
| N                                | 4.38801200  | 3.29180100 | 19.71961400 | H | 5.05196300 | 6.53794300  | 20.25688400 |
| C                                | 11.33272500 | 7.52300400 | 17.25461500 | C | 3.24597100 | 2.30818000  | 19.78356800 |
| H                                | 11.79154500 | 7.75839100 | 16.27523900 | H | 2.32239700 | 2.90059300  | 19.78131500 |
| H                                | 10.24966500 | 7.39956800 | 17.06974500 | H | 3.28366700 | 1.72415400  | 18.85371400 |
| C                                | 11.54934800 | 8.69489900 | 18.20470200 | C | 3.36992200 | 1.43769900  | 21.00824100 |
| H                                | 10.93686600 | 9.54418900 | 17.86673800 | C | 4.06396800 | 0.22418000  | 20.93513500 |
| H                                | 12.60110400 | 9.02187500 | 18.18808300 | H | 4.41352600 | -0.13579700 | 19.96409300 |
| C                                | 11.22241900 | 8.35068000 | 19.66297900 | C | 4.31100600 | -0.53590100 | 22.08856600 |
| H                                | 12.02933300 | 7.75766400 | 20.10631200 | C | 3.81468100 | -0.04401300 | 23.30720700 |
| H                                | 11.06040100 | 9.25222200 | 20.26703100 | H | 3.99731300 | -0.61925000 | 24.20949500 |
| C                                | 10.08981700 | 6.24349600 | 20.18434400 | C | 3.08929600 | 1.15536200  | 23.41343600 |
| H                                | 11.08768000 | 5.89077900 | 20.43750000 | C | 2.87829500 | 1.89034700  | 22.23716000 |
| C                                | 8.98277300  | 5.41883900 | 20.23108200 | H | 2.32323800 | 2.83120400  | 22.27724400 |
| H                                | 9.10376000  | 4.38680700 | 20.56734000 | C | 5.12277100 | -1.84001600 | 21.98256600 |
| C                                | 7.73531600  | 5.92673500 | 19.82670300 | H | 5.79053900 | -1.93055300 | 24.07866700 |
| C                                | 7.65871300  | 7.26961100 | 19.42703600 | C | 2.53076500 | 1.67361300  | 24.75180400 |
| H                                | 6.73113900  | 7.71582000 | 19.06955600 | C | 0.99063400 | 1.76096400  | 24.65020900 |
| C                                | 8.80001100  | 8.05935800 | 19.41500300 | H | 0.66650300 | 2.45606400  | 23.85990600 |
| H                                | 8.79694200  | 9.11075900 | 19.10121000 | H | 0.56614500 | 2.11917900  | 25.60120700 |
| C                                | 6.55913000  | 5.03124600 | 19.79316500 | H | 0.55245200 | 0.77461800  | 24.43248400 |
| C                                | 6.73542300  | 3.66073900 | 19.53659100 | C | 3.11294300 | 3.07486800  | 25.04627800 |
| H                                | 7.72667400  | 3.23604400 | 19.37073900 |   |            |             |             |

|   |             |             |             |   |             |             |             |
|---|-------------|-------------|-------------|---|-------------|-------------|-------------|
| H | 4.20947100  | 3.04446900  | 25.13084400 | C | 7.51160300  | 5.54877900  | 27.43755900 |
| H | 2.71432100  | 3.45936300  | 25.99769000 | H | 8.53208900  | 5.43359600  | 27.81179000 |
| H | 2.85231900  | 3.80640700  | 24.26411300 | C | 8.30918000  | 5.55460900  | 24.94862900 |
| C | 2.89135500  | 0.75160500  | 25.92970400 | H | 9.33323800  | 5.44413900  | 25.32616900 |
| H | 2.47486700  | -0.25949100 | 25.80382900 | C | 7.87351300  | 4.39710000  | 24.05580300 |
| H | 2.47525800  | 1.16257100  | 26.86162600 | C | 6.54733500  | 4.52810700  | 23.59464100 |
| H | 3.98086700  | 0.66612600  | 26.06572900 | C | 5.88002500  | 5.81727100  | 24.05977800 |
| O | 8.92045800  | 11.84082000 | 16.69348000 | H | 4.85318600  | 5.92568900  | 23.68653300 |
| O | 9.57829100  | 10.04281400 | 23.32876600 | C | 5.95320500  | 3.49655700  | 22.87894100 |
| O | 8.72661100  | 1.08021500  | 22.76679200 | H | 4.90760300  | 3.56502700  | 22.58049300 |
| O | 10.47527300 | 3.30228700  | 16.41998400 | C | 6.68386800  | 2.33731800  | 22.58341500 |
| N | 9.17125900  | 11.27745500 | 18.91156800 | H | 6.22542700  | 1.50283300  | 22.05561200 |
| N | 9.38517300  | 10.68399700 | 21.12555100 | C | 8.00716200  | 2.24500500  | 23.00284700 |
| N | 9.31777100  | 1.81227200  | 20.65572100 | C | 8.61607800  | 3.26275200  | 23.74856600 |
| N | 9.88494600  | 2.54326400  | 18.53744900 | H | 9.64143900  | 3.13234400  | 24.10027500 |
| C | 9.25326600  | 12.17543800 | 17.95843700 | C | 9.41956200  | 0.92472400  | 21.61764000 |
| C | 9.69782300  | 13.51511700 | 18.14810800 | C | 10.22663600 | -0.24811600 | 21.55761900 |
| H | 9.73505200  | 14.18994700 | 17.29266800 | H | 10.23656100 | -0.93052300 | 22.40764200 |
| C | 10.05901400 | 13.89493100 | 19.41753000 | C | 10.97408200 | -0.45144000 | 20.42575800 |
| H | 10.40818100 | 14.91121200 | 19.61705200 | H | 11.62183300 | -1.32677400 | 20.33247100 |
| C | 9.97029300  | 12.95867000 | 20.48488300 | C | 10.90741100 | 0.49063300  | 19.36213300 |
| C | 10.31204000 | 13.23584400 | 21.83551000 | C | 10.03899100 | 1.61572300  | 19.51902900 |
| H | 10.67366600 | 14.23047800 | 22.10855700 | C | 11.64252100 | 0.38243700  | 18.15285400 |
| C | 10.17357900 | 12.25386800 | 22.78902600 | H | 12.32058100 | -0.46184200 | 18.00471400 |
| H | 10.40816600 | 12.41205200 | 23.84174400 | C | 11.48607500 | 1.33720900  | 17.17696400 |
| C | 9.68747100  | 10.98693600 | 22.36491200 | H | 12.01699500 | 1.30561000  | 16.22544400 |
| C | 9.50557600  | 11.64304700 | 20.17541300 | C | 10.57027000 | 2.39519800  | 17.42769700 |
| C | 8.65814700  | 9.01371600  | 23.29060900 | C | 9.39391300  | 4.12594100  | 16.18371800 |
| C | 9.04147900  | 7.84262700  | 23.96094000 | C | 9.68595600  | 5.27925100  | 15.43876900 |
| H | 10.04662400 | 7.77792100  | 24.38242300 | H | 10.70881100 | 5.44838300  | 15.09481900 |
| C | 8.10582100  | 6.83167100  | 24.13974300 | C | 8.66244400  | 6.16357700  | 15.12868200 |
| C | 6.79479600  | 6.96726100  | 23.64197600 | C | 7.34356900  | 5.91284700  | 15.55817600 |
| C | 6.44115400  | 8.11481400  | 22.93811400 | C | 7.05741500  | 4.74199900  | 16.24951700 |
| H | 5.41932400  | 8.24304800  | 22.56852700 | H | 6.02899800  | 4.51742800  | 16.54570900 |
| C | 7.37254400  | 9.14837900  | 22.75538500 | C | 8.08097700  | 3.83258700  | 16.55753000 |
| H | 7.08529700  | 10.06250800 | 22.23767700 | H | 7.85805300  | 2.90155900  | 17.07110600 |
| C | 7.26467600  | 5.61940800  | 26.07062900 | C | 7.78895500  | 7.34714800  | 13.17967200 |
| C | 5.95037100  | 5.76932200  | 25.59010300 | C | 8.06812400  | 7.46625100  | 11.82215400 |
| C | 4.88058600  | 5.85041200  | 26.47504700 | H | 9.08914400  | 7.65284800  | 11.47954200 |
| H | 3.86041400  | 5.96843600  | 26.10134300 | C | 7.01976000  | 7.34580400  | 10.89692700 |
| C | 5.12816100  | 5.77927500  | 27.85497200 | H | 7.22756600  | 7.43894300  | 9.82856000  |
| H | 4.29536100  | 5.84407600  | 28.55908000 | C | 5.71407100  | 7.10976100  | 11.33429900 |
| C | 6.43246800  | 5.62893100  | 28.33192000 | H | 4.90445100  | 7.01958300  | 10.60643400 |
| H | 6.61612200  | 5.57531600  | 29.40743000 | C | 5.43454500  | 6.98967900  | 12.70432700 |

|   |            |             |             |   |             |             |             |
|---|------------|-------------|-------------|---|-------------|-------------|-------------|
| H | 4.41214600 | 6.80733100  | 13.04569800 | H | 22.72659400 | 24.69364000 | 22.37319500 |
| C | 6.47440300 | 7.10920300  | 13.62042700 | C | 25.35055300 | 23.31175800 | 20.54688900 |
| C | 6.36658900 | 7.00959000  | 15.14490600 | H | 25.54855200 | 23.00633700 | 19.50814900 |
| H | 5.34071100 | 6.82157600  | 15.48758100 | H | 25.52380200 | 22.43894700 | 21.19771000 |
| C | 8.79448800 | 7.45639300  | 14.32977300 | H | 26.08780100 | 24.08614800 | 20.81347400 |
| H | 9.81915700 | 7.64449100  | 13.98591800 | C | 23.70851300 | 25.08950000 | 19.81808000 |
| C | 8.26109800 | 8.55633400  | 15.24417800 | H | 24.40810600 | 25.89045000 | 20.10430500 |
| C | 6.94825800 | 8.31271800  | 15.69265000 | H | 22.68398500 | 25.48202200 | 19.91220300 |
| C | 6.30983300 | 9.23915200  | 16.51435400 | H | 23.88700700 | 24.86209200 | 18.75670200 |
| H | 5.28062700 | 9.06954600  | 16.84306500 | C | 22.00311900 | 20.73202100 | 17.12128600 |
| C | 6.97422400 | 10.41683900 | 16.88588600 | C | 22.84390700 | 21.60531600 | 16.17411200 |
| H | 6.48552100 | 11.16590600 | 17.51051700 | H | 22.77683100 | 21.21325000 | 15.14816700 |
| C | 8.27217600 | 10.64462300 | 16.42637500 | H | 23.90965700 | 21.60899200 | 16.45069600 |
| C | 8.93049100 | 9.71977400  | 15.60826500 | H | 22.48729800 | 22.64691800 | 16.15610100 |
| H | 9.93779200 | 9.94215500  | 15.25077000 | C | 20.54985100 | 20.70504300 | 16.59572000 |
| C | 6.54343300 | -1.50388300 | 21.46883400 | H | 20.53160000 | 20.35174000 | 15.55287800 |
| H | 6.52278200 | -1.01323200 | 20.48192300 | H | 20.09978900 | 21.70967800 | 16.62195600 |
| H | 7.13712900 | -2.42549400 | 21.36193000 | H | 19.90771000 | 20.02905800 | 17.18135500 |
| H | 7.07309200 | -0.83998400 | 22.16940400 | C | 22.57742700 | 19.29535900 | 17.11307300 |
| C | 5.26143200 | -2.55198400 | 23.33944900 | H | 21.98893500 | 18.61454800 | 17.74593600 |
| H | 5.84179900 | -3.47829500 | 23.21407700 | H | 23.61782700 | 19.28867100 | 17.47793100 |
| H | 4.28245200 | -2.83216300 | 23.75755900 | H | 22.57650300 | 18.88920300 | 16.08876100 |
| C | 4.42426500 | -2.80123500 | 20.99478100 | C | 20.43540000 | 20.34775200 | 21.90200000 |
| H | 3.40467300 | -3.04174700 | 21.33345200 | H | 20.20609100 | 20.97880400 | 22.77310700 |
| H | 4.98837100 | -3.74389300 | 20.91823000 | H | 19.49556200 | 19.93908200 | 21.51781000 |
| H | 4.35256700 | -2.37839900 | 19.98072000 | C | 22.49287000 | 18.96605000 | 22.16384600 |

### H@G1 (minor isomer, PR1b)

|   |             |             |             |
|---|-------------|-------------|-------------|
| O | 24.78671600 | 17.27544600 | 28.44559400 |
| N | 21.19461500 | 19.17223700 | 22.46467900 |
| C | 22.92168200 | 22.74589600 | 20.32654000 |
| C | 22.07258700 | 22.13257000 | 21.25239700 |
| H | 22.07974300 | 22.43601000 | 22.29839300 |
| C | 21.21787900 | 21.08978200 | 20.86255500 |
| C | 21.19220000 | 20.66125500 | 19.53466700 |
| H | 20.52773200 | 19.84115400 | 19.25896900 |
| C | 22.02386900 | 21.25499600 | 18.56843400 |
| C | 22.87327400 | 22.28526500 | 18.99468400 |
| H | 23.53261400 | 22.75585000 | 18.26760900 |
| C | 23.91291300 | 23.85416400 | 20.72271100 |
| C | 23.73527000 | 24.29136300 | 22.18825700 |
| H | 24.45426900 | 25.09016700 | 22.42654400 |
| H | 23.91275300 | 23.46448900 | 22.89288600 |

|   |             |             |             |
|---|-------------|-------------|-------------|
| H | 22.72659400 | 24.69364000 | 22.37319500 |
| C | 25.35055300 | 23.31175800 | 20.54688900 |
| H | 25.54855200 | 23.00633700 | 19.50814900 |
| H | 25.52380200 | 22.43894700 | 21.19771000 |
| H | 26.08780100 | 24.08614800 | 20.81347400 |
| C | 23.70851300 | 25.08950000 | 19.81808000 |
| H | 24.40810600 | 25.89045000 | 20.10430500 |
| H | 22.68398500 | 25.48202200 | 19.91220300 |
| H | 23.88700700 | 24.86209200 | 18.75670200 |
| C | 22.00311900 | 20.73202100 | 17.12128600 |
| C | 22.84390700 | 21.60531600 | 16.17411200 |
| H | 22.77683100 | 21.21325000 | 15.14816700 |
| H | 23.90965700 | 21.60899200 | 16.45069600 |
| H | 22.48729800 | 22.64691800 | 16.15610100 |
| C | 20.54985100 | 20.70504300 | 16.59572000 |
| H | 20.53160000 | 20.35174000 | 15.55287800 |
| H | 20.09978900 | 21.70967800 | 16.62195600 |
| H | 19.90771000 | 20.02905800 | 17.18135500 |
| C | 22.57742700 | 19.29535900 | 17.11307300 |
| H | 21.98893500 | 18.61454800 | 17.74593600 |
| H | 23.61782700 | 19.28867100 | 17.47793100 |
| H | 22.57650300 | 18.88920300 | 16.08876100 |
| C | 20.43540000 | 20.34775200 | 21.90200000 |
| H | 20.20609100 | 20.97880400 | 22.77310700 |
| H | 19.49556200 | 19.93908200 | 21.51781000 |
| C | 22.49287000 | 18.96605000 | 22.16384600 |
| H | 22.93562100 | 19.63098400 | 21.42525100 |
| C | 23.22375300 | 17.98441800 | 22.80503100 |
| H | 24.27581100 | 17.86270800 | 22.55209200 |
| C | 22.61211200 | 17.20702400 | 23.79906600 |
| C | 21.23511900 | 17.37513900 | 24.01134700 |
| H | 20.68740300 | 16.79905900 | 24.75652500 |
| C | 20.54408700 | 18.35779300 | 23.32367800 |
| H | 19.47196900 | 18.52447400 | 23.44290700 |
| C | 23.42946700 | 16.35866800 | 24.68921100 |
| C | 24.73542800 | 16.75967900 | 24.98910800 |
| H | 25.21502300 | 17.61776300 | 24.51723000 |
| C | 25.45155500 | 16.09379300 | 25.96621900 |
| H | 26.45003400 | 16.41681600 | 26.25177300 |
| C | 23.68517700 | 14.58912600 | 26.30658000 |
| H | 23.33005600 | 13.71733400 | 26.85794600 |
| C | 22.92109100 | 15.21895400 | 25.34475000 |
| H | 21.93352100 | 14.82094300 | 25.11078100 |
| C | 25.15469700 | 15.00360100 | 29.12936300 |

|   |             |             |             |   |             |             |             |
|---|-------------|-------------|-------------|---|-------------|-------------|-------------|
| H | 24.06687600 | 14.84352400 | 29.21841600 | C | 19.37839100 | 20.55955000 | 29.75085300 |
| H | 25.62865700 | 14.39413400 | 29.91589500 | H | 19.54079300 | 19.66895400 | 30.36372900 |
| C | 25.47184500 | 16.46960600 | 29.39723600 | C | 19.57077700 | 20.51354600 | 28.37396000 |
| H | 26.56743500 | 16.63101600 | 29.34069500 | C | 18.70504600 | 20.24388800 | 25.70959700 |
| H | 25.15996100 | 16.71283200 | 30.42902500 | C | 17.72838600 | 20.24539400 | 24.71994200 |
| O | 28.82275700 | 16.45626100 | 23.51929000 | H | 17.52839300 | 21.12687700 | 24.10727400 |
| O | 24.32126200 | 21.58497400 | 24.63970700 | C | 16.98089700 | 19.07828500 | 24.51594200 |
| O | 15.99686800 | 19.07619700 | 23.53367700 | C | 17.18691400 | 17.93479300 | 25.28328500 |
| O | 20.90784800 | 16.88678200 | 19.21336100 | H | 16.57671000 | 17.05000400 | 25.09518700 |
| N | 27.37989200 | 18.20089600 | 23.90666200 | C | 18.16929300 | 17.94633500 | 26.28580700 |
| N | 25.86121700 | 19.89332500 | 24.26302800 | H | 18.32131200 | 17.06117200 | 26.90931200 |
| N | 17.58157500 | 18.32097400 | 22.05593300 | C | 18.92766500 | 19.09446300 | 26.49606600 |
| N | 19.21687400 | 17.56782000 | 20.62233900 | C | 16.34654200 | 18.69434400 | 22.28637700 |
| C | 28.59699000 | 17.78903300 | 23.64186300 | C | 15.32019200 | 18.73622200 | 21.29752900 |
| C | 29.71634400 | 18.65022900 | 23.47450900 | H | 14.31599700 | 19.05194200 | 21.58172900 |
| C | 29.49178500 | 20.00594700 | 23.54511700 | C | 15.65836300 | 18.38484800 | 20.01396800 |
| H | 30.31304500 | 20.71307800 | 23.40282800 | H | 14.91339000 | 18.41365800 | 19.21473400 |
| C | 28.17865100 | 20.49435900 | 23.79075400 | C | 16.99294400 | 17.98266200 | 19.71810900 |
| C | 27.81991100 | 21.86807700 | 23.86104100 | C | 17.92693800 | 17.94615400 | 20.79988200 |
| H | 28.58165100 | 22.63607800 | 23.70455900 | C | 17.46692000 | 17.62917300 | 18.42826000 |
| C | 26.51935500 | 22.21759200 | 24.13724300 | H | 16.78421900 | 17.65162200 | 17.57499600 |
| H | 26.19064700 | 23.25390100 | 24.21257600 | C | 18.78309100 | 17.25499900 | 18.26441900 |
| C | 25.57895800 | 21.16932000 | 24.35508300 | H | 19.20019600 | 16.96682800 | 17.29954200 |
| C | 27.14116700 | 19.53130600 | 23.98590500 | C | 19.60894600 | 17.23024600 | 19.41947600 |
| C | 23.35742800 | 20.87965300 | 25.33406400 | C | 21.66060700 | 16.11279000 | 20.07225500 |
| C | 22.07293800 | 21.44975200 | 25.26159700 | C | 23.04303300 | 16.14308300 | 19.82342300 |
| H | 21.92945600 | 22.35631700 | 24.67042500 | H | 23.42956000 | 16.81984600 | 19.05889200 |
| C | 21.03778100 | 20.88997400 | 25.99779500 | C | 23.86776200 | 15.24745600 | 20.49028500 |
| C | 21.26033900 | 19.74792000 | 26.79516300 | C | 23.34063900 | 14.33177300 | 21.42378500 |
| C | 22.53031000 | 19.18859900 | 26.85753200 | C | 21.97807400 | 14.35765800 | 21.70708900 |
| H | 22.72515100 | 18.31311200 | 27.48269400 | H | 21.54837300 | 13.64327400 | 22.41523600 |
| C | 23.59242500 | 19.75439800 | 26.13110200 | C | 21.12584700 | 15.25019600 | 21.03486300 |
| H | 24.58608100 | 19.32072000 | 26.19341100 | H | 20.05559400 | 15.23835300 | 21.23266500 |
| C | 20.01259300 | 19.29918000 | 27.55141800 | C | 24.37278600 | 13.30845500 | 21.90397800 |
| H | 20.18352400 | 18.40673000 | 28.16709500 | H | 23.95676000 | 12.57994500 | 22.61200000 |
| C | 19.60672000 | 21.41434100 | 26.09477200 | C | 25.35098300 | 15.03046700 | 20.21851100 |
| H | 19.43488200 | 22.30786300 | 25.48118300 | H | 25.76804400 | 15.75571800 | 19.50868300 |
| C | 19.35479800 | 21.65884400 | 27.58592200 | C | 25.45117600 | 13.58286000 | 19.71977500 |
| C | 18.94752000 | 22.85305600 | 28.17150100 | C | 25.99232600 | 13.15992500 | 18.51063400 |
| H | 18.77774300 | 23.74217000 | 27.55877800 | H | 26.40977600 | 13.88374900 | 17.80594000 |
| C | 18.75368800 | 22.90062800 | 29.56071500 | C | 25.99623900 | 11.78939800 | 18.20704400 |
| H | 18.43156100 | 23.83268700 | 30.03059600 | H | 26.41995700 | 11.44589100 | 17.26059100 |
| C | 18.96687400 | 21.76338900 | 30.34370200 | C | 25.46293200 | 10.86429300 | 19.10752600 |
| H | 18.80969000 | 21.80930800 | 31.42380700 | H | 25.47038200 | 9.79976000  | 18.86236700 |

|   |             |             |             |   |            |             |             |
|---|-------------|-------------|-------------|---|------------|-------------|-------------|
| C | 24.91669100 | 11.29306300 | 20.32757200 | C | 4.18626100 | 4.60817600  | 19.81725600 |
| H | 24.49960300 | 10.56796700 | 21.03135500 | H | 3.15581800 | 4.95693600  | 19.89737200 |
| C | 24.91308300 | 12.65102500 | 20.62698700 | C | 5.25925700 | 5.47483600  | 19.82895700 |
| C | 25.55759200 | 14.08334100 | 22.47215000 | H | 5.06672900 | 6.54287000  | 19.93118900 |
| C | 26.20904000 | 13.86312000 | 23.67968400 | C | 3.20493100 | 2.32208700  | 19.76899800 |
| H | 25.86855900 | 13.06945200 | 24.35035900 | H | 2.29350300 | 2.93244900  | 19.72932800 |
| C | 27.31897700 | 14.65351300 | 24.03112500 | H | 3.24101300 | 1.70820300  | 18.85730700 |
| H | 27.85973900 | 14.49741700 | 24.96647400 | C | 3.25509000 | 1.46623800  | 21.01272300 |
| C | 27.74605200 | 15.65537200 | 23.16478500 | C | 3.88088800 | 0.21526600  | 20.97681200 |
| C | 27.13904100 | 15.84368000 | 21.91450600 | H | 4.23611300 | -0.17464000 | 20.01949600 |
| H | 27.53367900 | 16.59706400 | 21.22986000 | C | 4.06728200 | -0.53627700 | 22.14717500 |
| C | 26.05846000 | 15.04702400 | 21.56860900 | C | 3.57891700 | 0.00259400  | 23.34807500 |
| N | 24.92087900 | 15.04749000 | 26.62868000 | H | 3.71910000 | -0.56234900 | 24.26432500 |
| C | 25.64241800 | 14.45493700 | 27.78378300 | C | 2.91778100 | 1.24081800  | 23.41813800 |
| H | 24.86093300 | 18.20525000 | 28.70071900 | C | 2.76626900 | 1.96355800  | 22.22547700 |
| H | 25.49914900 | 13.36615700 | 27.73488700 | H | 2.27017800 | 2.93766800  | 22.23845100 |
| H | 26.71295400 | 14.65523500 | 27.63582200 | C | 4.80738400 | -1.88523700 | 22.07672600 |
| H | 30.69866500 | 18.22159900 | 23.27425900 | H | 5.48113000 | -1.94358900 | 24.17018600 |

### H@G3 (minor isomer, PR3a)

|   |             |            |             |   |             |             |             |
|---|-------------|------------|-------------|---|-------------|-------------|-------------|
| O | 12.33895800 | 7.41721700 | 16.85056100 | C | 2.37158500  | 1.81658400  | 24.73880100 |
| H | 12.20875000 | 6.78653100 | 17.57339600 | C | 0.84156800  | 1.99543100  | 24.61191500 |
| N | 4.36158800  | 3.26610400 | 19.71259300 | H | 0.57426000  | 2.69147800  | 23.80180400 |
| C | 11.42456500 | 8.47328600 | 17.04092300 | H | 0.42492700  | 2.39952700  | 25.54835200 |
| H | 11.68184300 | 9.26917400 | 16.32274700 | H | 0.34783500  | 1.03275500  | 24.40608400 |
| H | 10.39023200 | 8.15424600 | 16.82082200 | C | 3.03225400  | 3.18494700  | 25.02253600 |
| C | 11.47480100 | 9.05441800 | 18.44818400 | H | 4.12232400  | 3.08843800  | 25.13402400 |
| H | 10.73944400 | 9.86375800 | 18.55895900 | H | 2.63490600  | 3.61166900  | 25.95685200 |
| H | 12.47698900 | 9.44845100 | 18.66684700 | H | 2.83824400  | 3.91426400  | 24.21991700 |
| C | 10.13176400 | 6.13928300 | 20.17384300 | C | 2.65561000  | 0.89503200  | 25.93795200 |
| H | 11.08958300 | 5.78478600 | 20.55839500 | H | 2.18079300  | -0.09132100 | 25.82019800 |
| C | 8.99098300  | 5.36322700 | 20.26376700 | H | 2.25121800  | 1.34739400  | 26.85611000 |
| H | 9.04941500  | 4.37972400 | 20.73185800 | H | 3.73543100  | 0.74539500  | 26.09301100 |
| C | 7.75742100  | 5.84281000 | 19.76399200 | O | 8.06789300  | 12.11251900 | 16.73434700 |
| C | 7.71801400  | 7.13681400 | 19.20026200 | O | 9.85188200  | 9.63652300  | 22.92936600 |
| H | 6.78768900  | 7.53717900 | 18.79249900 | O | 8.67007400  | 0.79399500  | 22.74796000 |
| C | 8.86430600  | 7.90677000 | 19.07113500 | O | 10.60105500 | 3.57434900  | 16.69675500 |
| H | 8.79314800  | 8.89737600 | 18.62513700 | N | 8.69248400  | 11.33500600 | 18.80338100 |
| C | 6.58703300  | 4.98291100 | 19.76405700 | N | 9.28094900  | 10.50709500 | 20.86929300 |
| C | 6.72775200  | 3.57597600 | 19.66892900 | N | 9.30856700  | 1.66890900  | 20.71251800 |
| H | 7.71439300  | 3.11691900 | 19.61424300 | N | 9.93029500  | 2.59505400  | 18.69260000 |
| C | 5.62311400  | 2.76368900 | 19.63229700 | C | 8.67256300  | 12.30773900 | 17.92959600 |
| H | 5.70918100  | 1.68053000 | 19.56179100 | C | 9.25944300  | 13.59064800 | 18.13566100 |
|   |             |            |             | H | 9.18609800  | 14.34569100 | 17.35257800 |
|   |             |            |             | C | 9.91572000  | 13.80481700 | 19.32395200 |
|   |             |            |             | H | 10.40001800 | 14.76364700 | 19.52748500 |

|   |             |             |             |   |             |             |             |
|---|-------------|-------------|-------------|---|-------------|-------------|-------------|
| C | 9.96998900  | 12.77026300 | 20.29857400 | C | 11.13420200 | 0.62842000  | 19.48459000 |
| C | 10.63429600 | 12.86598100 | 21.55125900 | C | 10.12422700 | 1.63135600  | 19.62800900 |
| H | 11.15940500 | 13.78770800 | 21.81562500 | C | 11.97784200 | 0.70186700  | 18.34321200 |
| C | 10.60241800 | 11.80277700 | 22.42251500 | H | 12.76856200 | -0.04036900 | 18.20592300 |
| H | 11.08574800 | 11.82300100 | 23.39949900 | C | 11.78934000 | 1.70403000  | 17.42446200 |
| C | 9.87764600  | 10.64139000 | 22.02404100 | H | 12.40430900 | 1.81368600  | 16.53103700 |
| C | 9.30945500  | 11.53817800 | 19.99441700 | C | 10.72228600 | 2.62531900  | 17.64906000 |
| C | 8.86518200  | 8.67209300  | 23.01957000 | C | 9.48386800  | 4.35296200  | 16.45107800 |
| C | 9.23630900  | 7.52940900  | 23.74602700 | C | 9.75194400  | 5.57313800  | 15.80940300 |
| H | 10.26518200 | 7.43918400  | 24.09934700 | H | 10.78823100 | 5.87308500  | 15.64102100 |
| C | 8.27510800  | 6.57122500  | 24.03592300 | C | 8.68419000  | 6.36189500  | 15.40051600 |
| C | 6.94547400  | 6.73303300  | 23.60325300 | C | 7.35688500  | 5.97082500  | 15.66458900 |
| C | 6.59857400  | 7.84942700  | 22.85182900 | C | 7.10826400  | 4.76348700  | 16.30538300 |
| H | 5.56828500  | 7.98688000  | 22.51152900 | H | 6.08069700  | 4.44265200  | 16.49745600 |
| C | 7.55647300  | 8.82835000  | 22.55080100 | C | 8.17300600  | 3.93648600  | 16.69134800 |
| H | 7.28064900  | 9.70195000  | 21.96598800 | H | 7.98220600  | 2.97885400  | 17.16806700 |
| C | 7.49205200  | 5.45611400  | 26.05189700 | C | 7.94233900  | 7.40160900  | 13.32683000 |
| C | 6.15944800  | 5.62788100  | 25.62952200 | C | 8.37944200  | 7.51263300  | 12.01134100 |
| C | 5.13744800  | 5.76642600  | 26.56263500 | H | 9.41077300  | 7.80336900  | 11.79477700 |
| H | 4.10391100  | 5.89916700  | 26.23258700 | C | 7.48101200  | 7.24674900  | 10.96585400 |
| C | 5.44877800  | 5.73538400  | 27.93133700 | H | 7.81578100  | 7.33177900  | 9.92921900  |
| H | 4.65236300  | 5.84559100  | 28.67141200 | C | 6.16381700  | 6.87533100  | 11.24435700 |
| C | 6.77039100  | 5.56685900  | 28.35028000 | H | 5.47044700  | 6.67113900  | 10.42484900 |
| H | 7.00537800  | 5.54491100  | 29.41716500 | C | 5.72396900  | 6.76331800  | 12.57298100 |
| C | 7.80134800  | 5.42582000  | 27.40754000 | H | 4.69271300  | 6.47286700  | 12.79144100 |
| H | 8.83602600  | 5.29442000  | 27.73513900 | C | 6.61452100  | 7.02691700  | 13.60806300 |
| C | 8.47623600  | 5.31815900  | 24.88507100 | C | 6.32545100  | 6.95075700  | 15.11054700 |
| H | 9.51402800  | 5.18640500  | 25.21587700 | H | 5.29153100  | 6.65374000  | 15.33002300 |
| C | 7.96009100  | 4.14331800  | 24.05801100 | C | 8.77199100  | 7.65456100  | 14.58930900 |
| C | 6.62007100  | 4.30611100  | 23.65054100 | H | 9.80466500  | 7.95000600  | 14.36783100 |
| C | 6.01634800  | 5.62986900  | 24.10511300 | C | 8.00087600  | 8.71447700  | 15.37051400 |
| H | 4.97737600  | 5.75953800  | 23.77550200 | C | 6.67892700  | 8.32925400  | 15.66760800 |
| C | 5.96898700  | 3.28854200  | 22.96755200 | C | 5.83583900  | 9.20067800  | 16.35186000 |
| H | 4.92663900  | 3.40071000  | 22.67146100 | H | 4.80518000  | 8.91062800  | 16.57359400 |
| C | 6.65205600  | 2.10250000  | 22.66391100 | C | 6.30373600  | 10.46651400 | 16.73717100 |
| H | 6.15593600  | 1.28975800  | 22.13795300 | H | 5.66413500  | 11.17056200 | 17.27155200 |
| C | 7.98413600  | 1.97233400  | 23.03514300 | C | 7.60805100  | 10.83672700 | 16.42099700 |
| C | 8.65305800  | 2.98161200  | 23.74181400 | C | 8.46939400  | 9.96962000  | 15.73919800 |
| H | 9.69277300  | 2.83325300  | 24.04045900 | H | 9.48159400  | 10.29869000 | 15.49865800 |
| C | 9.44714000  | 0.75163400  | 21.63766500 | C | 6.24024400  | -1.65378800 | 21.53958500 |
| C | 10.37695300 | -0.32484700 | 21.57365800 | H | 6.23739900  | -1.18774800 | 20.54137200 |
| H | 10.40755800 | -1.05382500 | 22.38364300 | H | 6.77092600  | -2.61505500 | 21.44906800 |
| C | 11.22423300 | -0.36887300 | 20.49259800 | H | 6.82450800  | -1.00848500 | 22.21354400 |
| H | 11.97504700 | -1.15862600 | 20.40446300 | C | 4.91769200  | -2.56176600 | 23.45404500 |

|   |             |             |             |   |             |             |             |
|---|-------------|-------------|-------------|---|-------------|-------------|-------------|
| H | 5.45083600  | -3.51955800 | 23.35528800 | C | 22.95309600 | 18.81646400 | 16.43908100 |
| H | 3.92819600  | -2.77862900 | 23.88545500 | H | 22.09919900 | 18.30275200 | 16.90462600 |
| C | 4.04421100  | -2.83447700 | 21.12557700 | H | 23.87853300 | 18.45619500 | 16.91701000 |
| H | 3.01783200  | -3.01006700 | 21.48413800 | H | 22.97668000 | 18.51100900 | 15.38115500 |
| H | 4.55630400  | -3.80802200 | 21.06578900 | C | 21.01265400 | 19.94862500 | 21.25151100 |
| H | 3.97959400  | -2.43202200 | 20.10288400 | H | 20.55312700 | 20.68949600 | 21.92274900 |
| C | 10.08898300 | 7.39683200  | 19.54170800 | H | 20.20661100 | 19.40116500 | 20.74983100 |
| O | 11.27663000 | 8.02801600  | 19.42807800 | C | 23.00964900 | 18.70505300 | 22.11346200 |

### H@G3 (major isomer, PR3b)

|   |             |             |             |   |             |             |             |
|---|-------------|-------------|-------------|---|-------------|-------------|-------------|
| O | 22.73443700 | 17.24218300 | 29.77190900 | C | 22.84763100 | 17.28706100 | 24.06565300 |
| N | 21.67894100 | 18.95157700 | 22.14796800 | C | 21.45088500 | 17.49922800 | 24.00940000 |
| C | 23.64777700 | 22.28739300 | 19.82256500 | H | 20.77664000 | 17.08401500 | 24.75476700 |
| C | 22.75023700 | 21.67284400 | 20.70022000 | C | 20.89470000 | 18.32269500 | 23.05828500 |
| H | 22.68673300 | 21.99077800 | 21.74185500 | H | 19.81909000 | 18.50993700 | 23.00791500 |
| C | 21.93226200 | 20.61651100 | 20.27208300 | C | 23.45579500 | 16.59655300 | 25.20653900 |
| C | 21.98973200 | 20.17764300 | 18.94805600 | C | 24.79150800 | 16.86441300 | 25.57802000 |
| H | 21.34339900 | 19.35349800 | 18.63906400 | H | 25.42795200 | 17.47287300 | 24.93352300 |
| C | 22.85630800 | 20.78886900 | 18.02391500 | C | 25.28404000 | 16.45335500 | 26.80936400 |
| C | 23.67749200 | 21.82371800 | 18.49235200 | H | 26.29618000 | 16.70985600 | 27.12760600 |
| H | 24.36738600 | 22.29961500 | 17.79964700 | C | 23.16210200 | 15.39085300 | 27.31264000 |
| C | 24.62165600 | 23.38009700 | 20.29890400 | H | 22.51351000 | 14.82113300 | 27.97589600 |
| C | 24.11396000 | 24.07880100 | 21.57572300 | C | 22.67936700 | 15.80842100 | 26.08042300 |
| H | 24.81058700 | 24.88067600 | 21.86491000 | H | 21.65932200 | 15.53227500 | 25.80793000 |
| H | 24.04225900 | 23.39507900 | 22.43367000 | C | 24.15964900 | 15.32938400 | 30.07843100 |
| H | 23.12303200 | 24.53238100 | 21.41539400 | H | 23.30001500 | 14.66971300 | 29.87508300 |
| C | 25.97360900 | 22.69547200 | 20.60361100 | H | 24.79575600 | 14.82826000 | 30.82229800 |
| H | 26.37640700 | 22.19572700 | 19.70875400 | C | 23.68691100 | 16.65816900 | 30.64474800 |
| H | 25.85713300 | 21.93701800 | 21.39172200 | H | 24.57037500 | 17.31075100 | 30.77533100 |
| H | 26.71622700 | 23.43281500 | 20.94906900 | H | 23.25545100 | 16.46686600 | 31.64792800 |
| C | 24.82541900 | 24.45989700 | 19.21570400 | O | 28.41993600 | 17.50518800 | 22.25220800 |
| H | 25.47856800 | 25.25882800 | 19.59984600 | O | 24.03301000 | 22.11354900 | 24.98429300 |
| H | 23.86648000 | 24.91474900 | 18.92161900 | O | 16.11414700 | 18.69881000 | 24.13526500 |
| H | 25.30634500 | 24.06215900 | 18.31003000 | O | 20.27163000 | 16.95075900 | 18.91141800 |
| C | 22.83511800 | 20.35236500 | 16.54728600 | N | 26.96388000 | 19.07005600 | 23.11203300 |
| C | 23.98080500 | 20.98230400 | 15.73592600 | N | 25.49899700 | 20.61166300 | 24.01090700 |
| H | 23.94392500 | 20.62202700 | 14.69643000 | N | 17.48639600 | 18.21692000 | 22.34984500 |
| H | 24.96651600 | 20.71398600 | 16.14804900 | N | 18.85658100 | 17.62498100 | 20.59713100 |
| H | 23.90846500 | 22.08004100 | 15.70177900 | C | 28.15748700 | 18.76366300 | 22.66727400 |
| C | 21.48875500 | 20.79970600 | 15.93115100 | C | 29.25099500 | 19.67530500 | 22.57977700 |
| H | 21.43075700 | 20.50032800 | 14.87198200 | C | 29.03414800 | 20.96952600 | 22.97930100 |
| H | 21.37564600 | 21.89387000 | 15.98471100 | H | 29.83397000 | 21.71287500 | 22.92683500 |
| H | 20.63517900 | 20.34614400 | 16.45896700 | C | 27.75490300 | 21.34763900 | 23.47106000 |



|   |             |             |             |   |             |             |             |
|---|-------------|-------------|-------------|---|-------------|-------------|-------------|
| C | 27.42397700 | 22.65246300 | 23.91863000 | C | 17.61895200 | 17.96887500 | 21.02272900 |
| H | 28.17606000 | 23.44462300 | 23.87681400 | C | 16.76566100 | 17.78108100 | 18.74575600 |
| C | 26.16686000 | 22.90212900 | 24.41430300 | H | 15.94623600 | 17.84545400 | 18.02501200 |
| H | 25.85911200 | 23.87814700 | 24.78918500 | C | 18.02945300 | 17.41522500 | 18.33840800 |
| C | 25.24798500 | 21.81648600 | 24.45681300 | H | 18.27112400 | 17.17001300 | 17.30410500 |
| C | 26.73569900 | 20.34234100 | 23.52684300 | C | 19.03987800 | 17.33075400 | 19.33441400 |
| C | 23.24601600 | 21.20278200 | 25.66811600 | C | 21.15537900 | 16.22127400 | 19.69993800 |
| C | 21.89741100 | 21.57194100 | 25.80609000 | C | 22.48891900 | 16.24343900 | 19.26542200 |
| H | 21.55379000 | 22.50738000 | 25.35956100 | H | 22.76492900 | 16.85993900 | 18.41130700 |
| C | 21.05091600 | 20.75526000 | 26.54481700 | C | 23.41956600 | 15.43980800 | 19.90950800 |
| C | 21.52213600 | 19.55217400 | 27.10424200 | C | 23.04445100 | 14.63229300 | 20.99963900 |
| C | 22.86653000 | 19.22220700 | 27.00231300 | C | 21.72527600 | 14.63684500 | 21.43510500 |
| H | 23.24496700 | 18.31997800 | 27.48217400 | H | 21.41988600 | 14.00983000 | 22.27670200 |
| C | 23.73997200 | 20.05051300 | 26.28505200 | C | 20.76731400 | 15.42787300 | 20.78394300 |
| H | 24.78806200 | 19.77826000 | 26.19720300 | H | 19.73528300 | 15.41564100 | 21.12513800 |
| C | 20.43857800 | 18.75622200 | 27.83088500 | C | 24.19306800 | 13.78214600 | 21.53758000 |
| H | 20.81031800 | 17.80605300 | 28.23261800 | H | 23.89892300 | 13.15405100 | 22.38797900 |
| C | 19.58156200 | 21.01788900 | 26.86851300 | C | 24.88609100 | 15.27357400 | 19.52386400 |
| H | 19.21606100 | 21.97125200 | 26.46653700 | H | 25.18004200 | 15.90394200 | 18.67495500 |
| C | 19.46137200 | 20.92851000 | 28.39422200 | C | 25.07081700 | 13.77839600 | 19.25001900 |
| C | 18.97087500 | 21.90989700 | 29.24908700 | C | 25.55039900 | 13.20293600 | 18.07820100 |
| H | 18.61233400 | 22.86243700 | 28.84982300 | H | 25.84184000 | 13.83190300 | 17.23275900 |
| C | 18.94381900 | 21.66589300 | 30.63204900 | C | 25.65662100 | 11.80567900 | 17.99447900 |
| H | 18.55997100 | 22.43279800 | 31.30908500 | H | 26.03287800 | 11.34474400 | 17.07802200 |
| C | 19.40478600 | 20.45151700 | 31.14559300 | C | 25.28491900 | 11.00376600 | 19.07598600 |
| H | 19.37869800 | 20.27088800 | 32.22303800 | H | 25.37103600 | 9.91689000  | 19.00333000 |
| C | 19.89729800 | 19.45879900 | 30.28280600 | C | 24.80093900 | 11.58597900 | 20.25816000 |
| H | 20.25911500 | 18.50367800 | 30.67451700 | H | 24.51026500 | 10.95870200 | 21.10508900 |
| C | 19.92065700 | 19.70218500 | 28.91304700 | C | 24.69555100 | 12.97037800 | 20.34025900 |
| C | 18.82928300 | 19.81307600 | 26.31624000 | C | 25.32208800 | 14.75132900 | 21.87813500 |
| C | 17.78917000 | 19.84946900 | 25.39622900 | C | 25.99154900 | 14.86192000 | 23.09188700 |
| H | 17.41310300 | 20.79013300 | 24.98908500 | H | 25.71064700 | 14.23330500 | 23.93983800 |
| C | 17.20341300 | 18.64275800 | 25.00016800 | C | 27.03196600 | 15.79325800 | 23.22662900 |
| C | 17.63850800 | 17.41990500 | 25.50657600 | H | 27.57376700 | 15.90476000 | 24.16676100 |
| H | 17.15072600 | 16.50050600 | 25.17908700 | C | 27.37016400 | 16.59942700 | 22.14457600 |
| C | 18.69121500 | 17.39556400 | 26.43558700 | C | 26.71015400 | 16.49695100 | 20.91433300 |
| H | 19.03208400 | 16.44232100 | 26.84860300 | H | 27.01367000 | 17.13773000 | 20.08410800 |
| C | 19.29013800 | 18.58735500 | 26.83657600 | C | 25.69005300 | 15.56426900 | 20.78719400 |
| C | 16.29330400 | 18.49244100 | 22.81404200 | H | 22.63776400 | 18.18055800 | 29.98284200 |
| C | 15.11690800 | 18.59433600 | 22.01115700 | H | 30.20863100 | 19.32190300 | 22.19681000 |
| H | 14.16723900 | 18.83585100 | 22.48917500 | C | 24.45646700 | 15.76487100 | 27.71610100 |
| C | 15.24203200 | 18.38230600 | 20.66111500 | O | 24.98663600 | 15.49824600 | 28.92929800 |
| H | 14.37322800 | 18.45391900 | 20.00158600 |   |             |             |             |
| C | 16.51475400 | 18.05172200 | 20.11674000 |   |             |             |             |

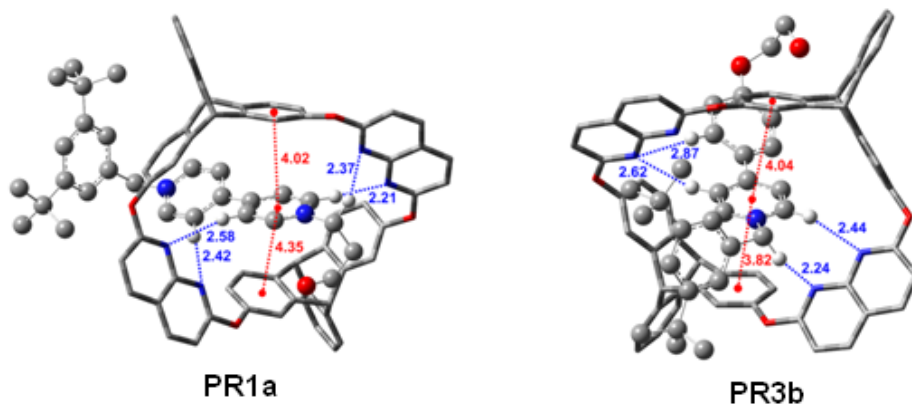

**Fig. S46** DFT optimized structures of **PR1a** and **PR3b**. The key distances for H-bonding interactions between N and H atoms (dash lines in blue) and  $\pi$ - $\pi$  stacking interactions between pyridyl and phenyl ring centers (dash lines in red) are labeled in Angstrom. H atoms not involved in H-bonding are omitted for clarity.

## 11. References

- [1] R. F. Munh á L. G. Alves, N. Maulide, M. T. Duarte, I. E. Mark ó M. D. Fryzuk and A. M. Martins, *Inorg. Chem. Commun.*, 2008, **44**, 1174-1176.
- [2] A. G égout, J. L. Delgado, J.-F. Nierengarten, B. Delavaux-Nicot, A. Listorti, C. Chiorboli and A. Belbakra, N. Armaroli, *New J. Chem.*, 2009, **33**, 2174-2182.
- [3] All the units of the NMR spectra in the supporting information are ppm.
- [4] In order that the ratio of the isomers could be calculated as precisely as possible, we did not make the effort to further purify the mixture of them, since the two integrated peaks chosen for comparison would not be affected by the small amount of remaining impurities.
- [5] The relatively high value of *R* was probably caused by the high intrinsic nonsymmetry of the rotaxane **R3b** molecule itself.
- [6] Gaussian 09, revision C.01; M. J. Frisch, G. W. Trucks, H. B. Schlegel, G. E. Scuseria, M. A. Robb, J. R. Cheeseman, G. Scalmani, V. Barone, B. Mennucci, G. A. Petersson, H. Nakatsuji, M. Caricato, X. Li, H. P. Hratchian, A. F. Izmaylov, J. Bloino, G. Zheng, J. L. Sonnenberg, M. Hada, M. Ehara, K. Toyota, R. Fukuda, J. Hasegawa, M. Ishida, T. Nakajima, Y. Honda, O. Kitao, H. Nakai, T. Vreven, J. A. Montgomery, Jr., J. E. Peralta, F. Ogliaro, M. Bearpark, J. J. Heyd, E. Brothers, K. N. Kudin, V. N. Staroverov, R. Kobayashi, J. Normand, K. Raghavachari, A. Rendell, J. C. Burant, S. S. Iyengar, J. Tomasi, M. Cossi, N. Rega, J. M. Millam, M. Klene, J. E. Knox, J. B. Cross, V. Bakken, C. Adamo, J. Jaramillo, R. Gomperts, R. E. Stratmann, O. Yazyev, A. J. Austin, R. Cammi, C. Pomelli, J. W. Ochterski, R. L. Martin, K. Morokuma, V. G. Zakrzewski, G. A. Voth, P. Salvador, J. J. Dannenberg, S. Dapprich, A. D. Daniels, O. Farkas, J. B. Foresman, J. V. Ortiz, J. Cioslowski, and D. J. Fox, Gaussian, Inc., Wallingford CT, 2009.
- [7] a) A. D. Becke, *Phys. Rev. A*, 1988, **38**, 3098-3100; b) C. Lee, W. Yang and R. G. Parr, *Phys. Rev. B*, 1988, **37**, 785-789; c) A. D. Becke, *J. Chem. Phys.*, 1993, **98**, 5648-5652; d) A. D. Becke, *J. Chem. Phys.*, 1993, **98**, 1372-1377; e) P. J. Stephens, F. J. Devlin, M. J. Frisch and C. F. Chabalowski, *J. Phys. Chem.*, 1994, **98**, 11623-11627.
- [8] F. Weigend and R. Ahlrichs, *Phys. Chem. Chem. Phys.*, 2005, **7**, 3297-3305.
- [9] S. Grimme, J. Antony, S. Ehrlich and H. Krieg, *J. Chem. Phys.*, 2010, **132**, 154104.
- [10] A. V. Marenich, C. J. Cramer and D. G. Truhlar, *J. Phys. Chem. B*, 2009, **113**, 6378-6396.
